# Supplementary material for: In vitro antitumor activity, molecular dynamics simulation, DFT study, ADME prediction, and Eg5 binding of enastron analogues
Source: Royal Society of Chemistry journal article supplement (doi:10.1039/d3ra02904b), 2023-01-01
Supplement: d3ra02904b1.pdf [file d3ra02904b1.pdf]

***In vitro* antitumor activity, molecular dynamics simulation, DFT study, ADME prediction, and Eg5 binding of Enastron analogues**

**Abdeslem Bouzina,<sup>a\*</sup> Yousra Ouafa Bouone,<sup>a</sup> Omar Sekiou,<sup>b</sup> Mohamed Aissaoui,<sup>a</sup> Tan-Sothea Ouk,<sup>c</sup> Abdelhak Djemel,<sup>d</sup> Rachida Mansouri,<sup>b</sup> Malika Ibrahim-Ouali,<sup>e</sup> Zihad Bouslama,<sup>b</sup> and Nour-Eddine Aouf<sup>a</sup>**

<sup>a</sup>*Laboratory of Applied Organic Chemistry, Bioorganic Chemistry Group, Department of Chemistry, Sciences Faculty, Badji Mokhtar Annaba University, Box 12, 23000 Annaba, Algeria.*

<sup>b</sup>*Environmental Research Center (CRE), 23000 Annaba, Algeria.*

<sup>c</sup>*Université de Limoges, LABCiS, UR 22722, F-87000 Limoges, France.*

<sup>d</sup>*Research Unit in Medicinal Plants, URPM, 3000 Laghouat, attached to Research Center of Biotechnology, CRBT, 25000 Constantine, Algeria.*

<sup>e</sup>*Aix Marseille Univ, CNRS, Centrale Marseille, iSm2, Marseille F-13397, France*

\*Corresponding author. Email: [abdeslem.bouzina@univ-annaba.dz](mailto:abdeslem.bouzina@univ-annaba.dz), [bouzinaabdeslem@yahoo.fr](mailto:bouzinaabdeslem@yahoo.fr)

P3M1.10.fid

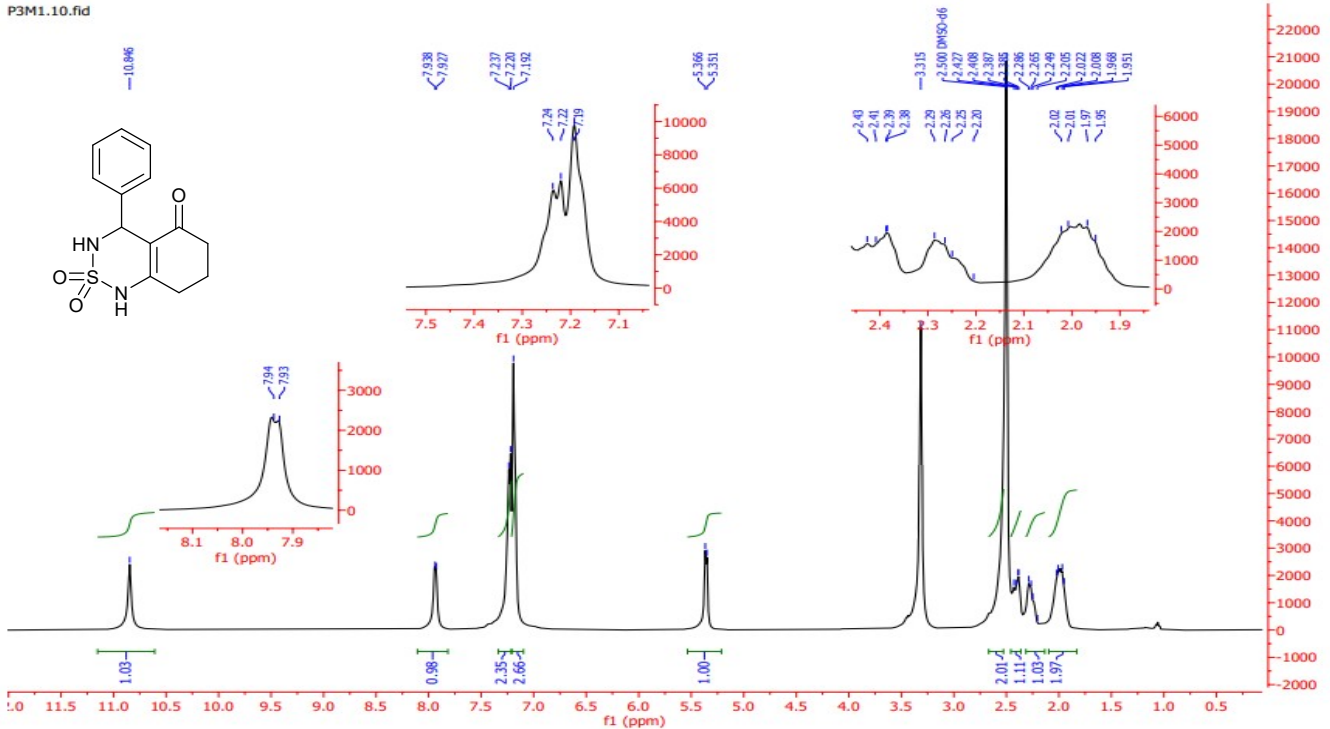

P3M1.11.fid

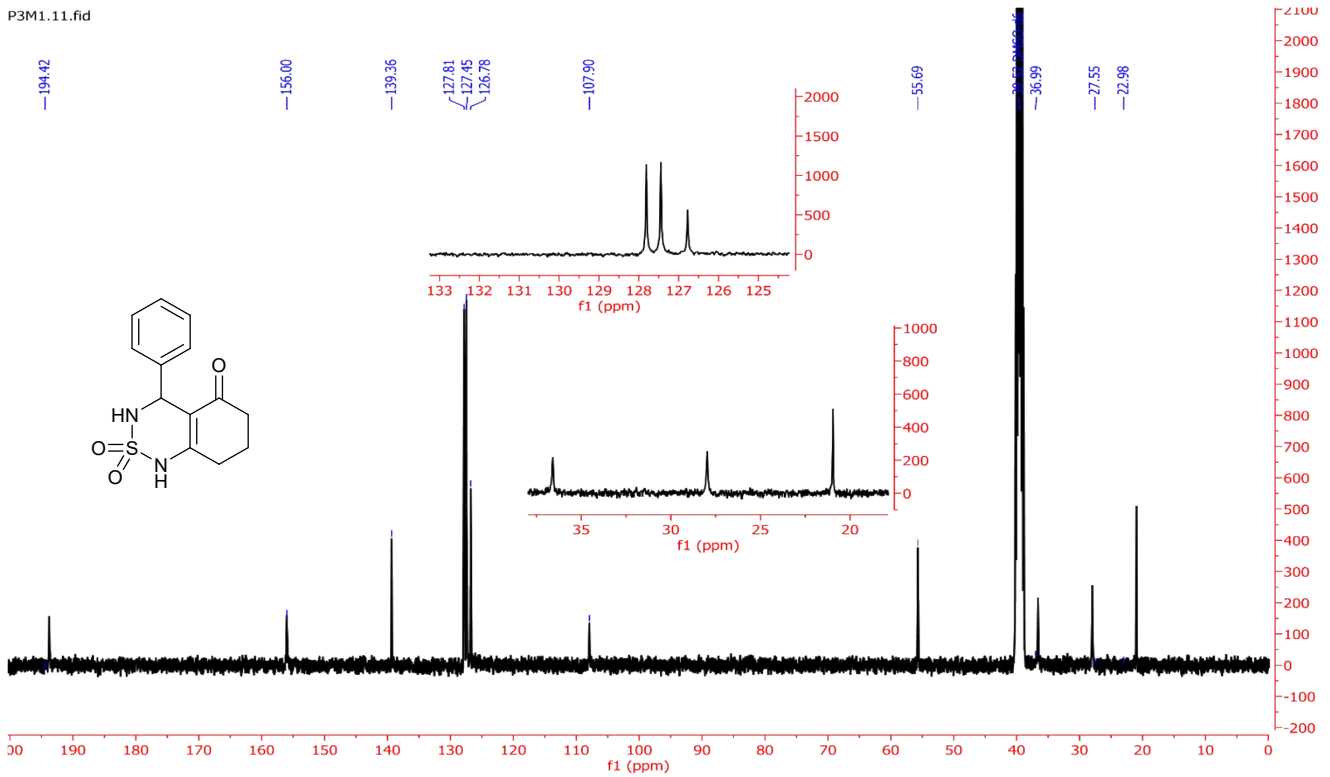

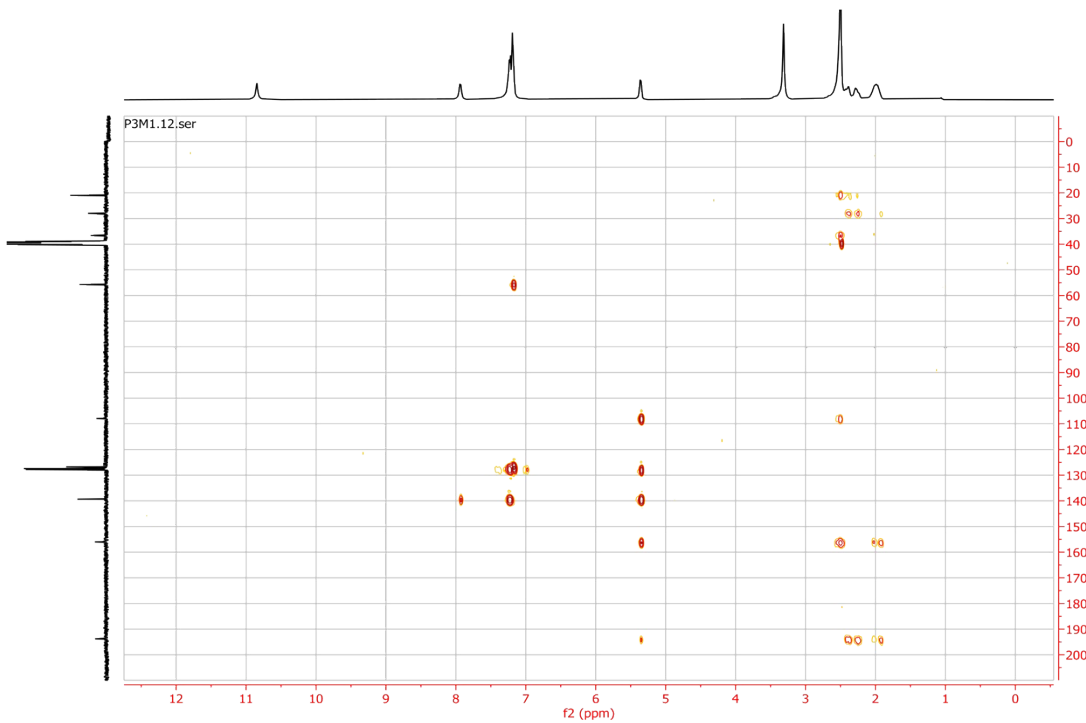

ro-1H-benzo[c][1,2,6]thiadiazin-5(3H)-one 2,2-dioxide

**HMBC  
Spectru  
m: 4-  
phenyl-  
4,6,7,8-  
tetrahyd**

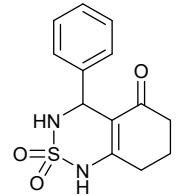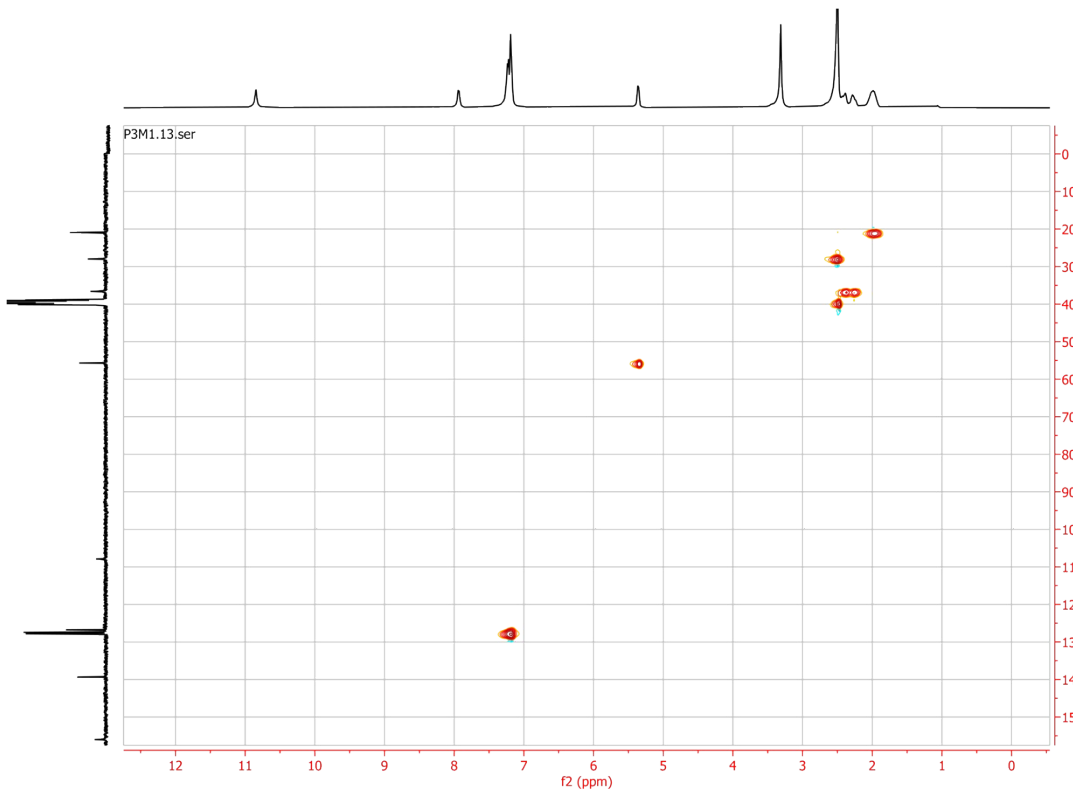

**HMQC  
Spectru  
m: 4-  
phenyl-  
4,6,7,8-  
tetrahy  
dro-1H-**

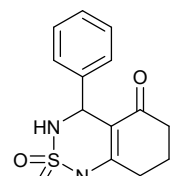

benzo[c][1,2,6]thiadiazin-5(3H)-one 2,2-dioxide

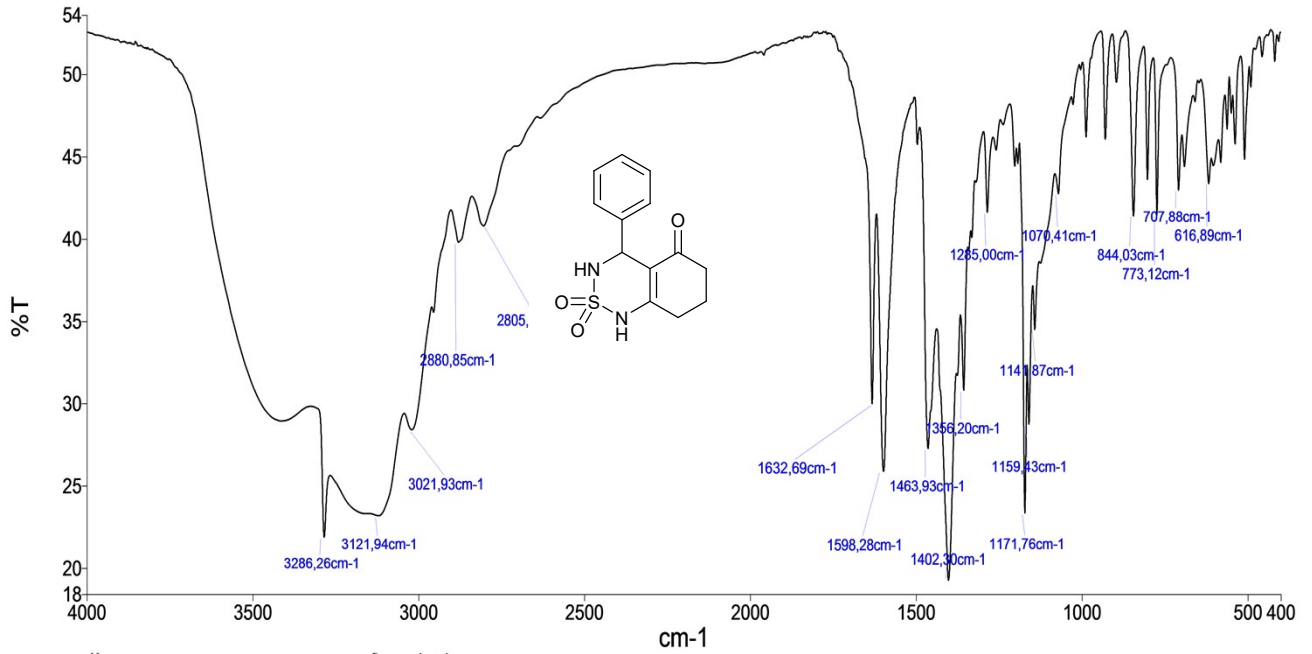

Nom Description  
 BABB\_1 Échantillon 009 Par Administrator Date jeudi, décembre 13 2018

IR Spectrum: 4-phenyl-4,6,7,8-tetrahydro-1H-benzo[c][1,2,6]thiadiazin-5(3H)-one 2,2-dioxide

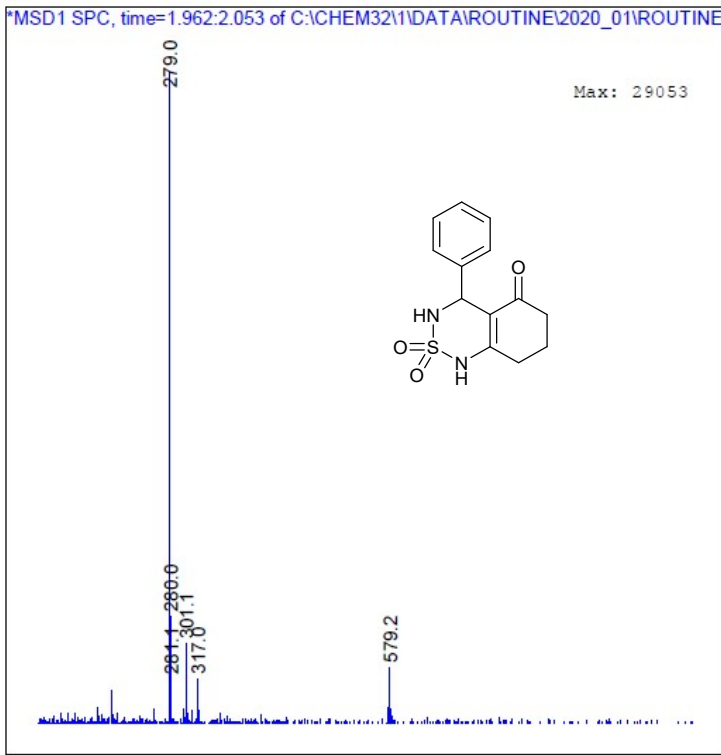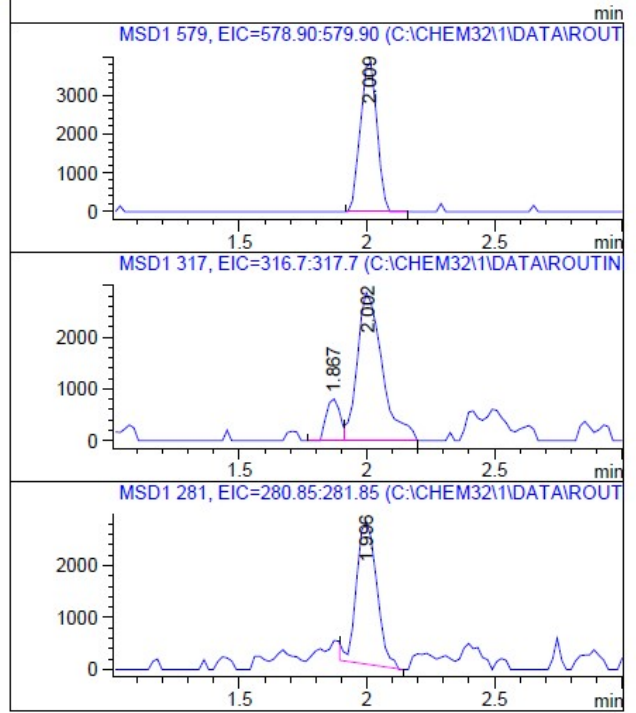

LC-MS: 4-phenyl-4,6,7,8-tetrahydro-1H-benzo[c][1,2,6]thiadiazin-5(3H)-one 2,2-dioxide

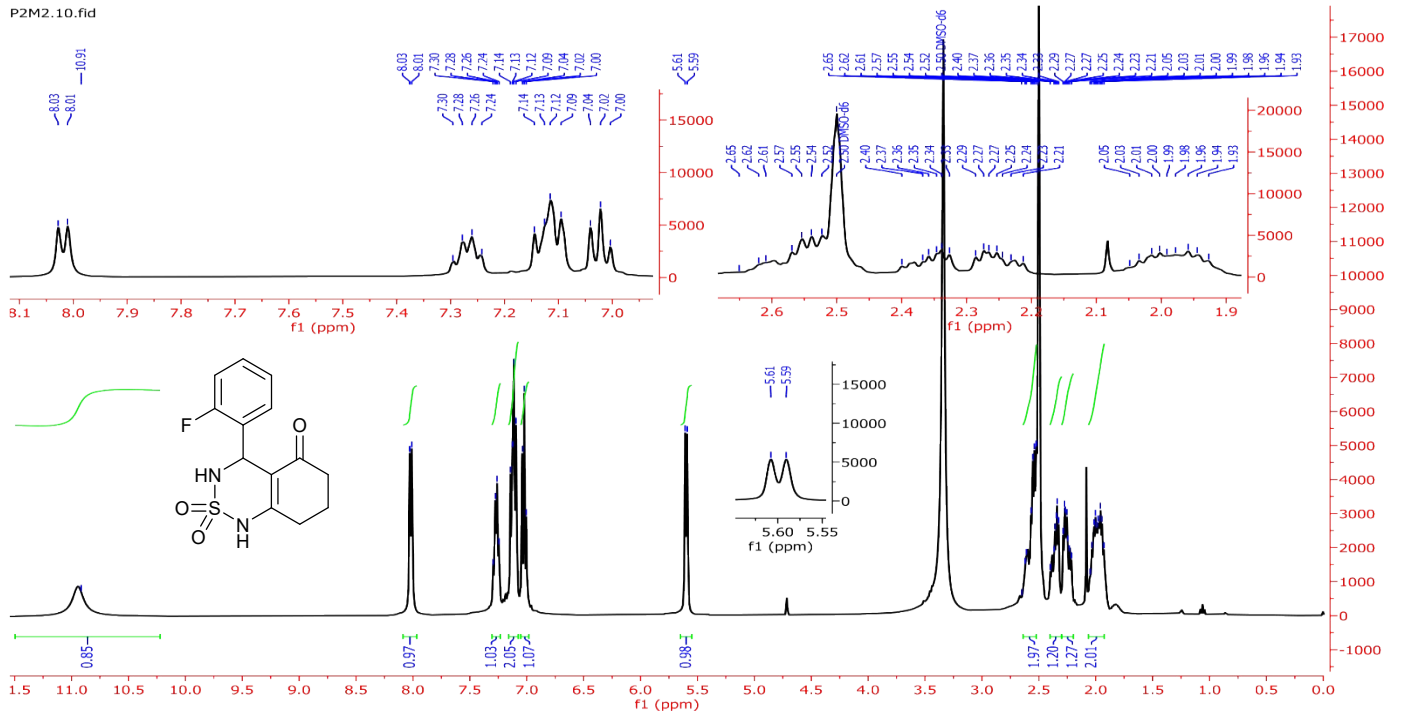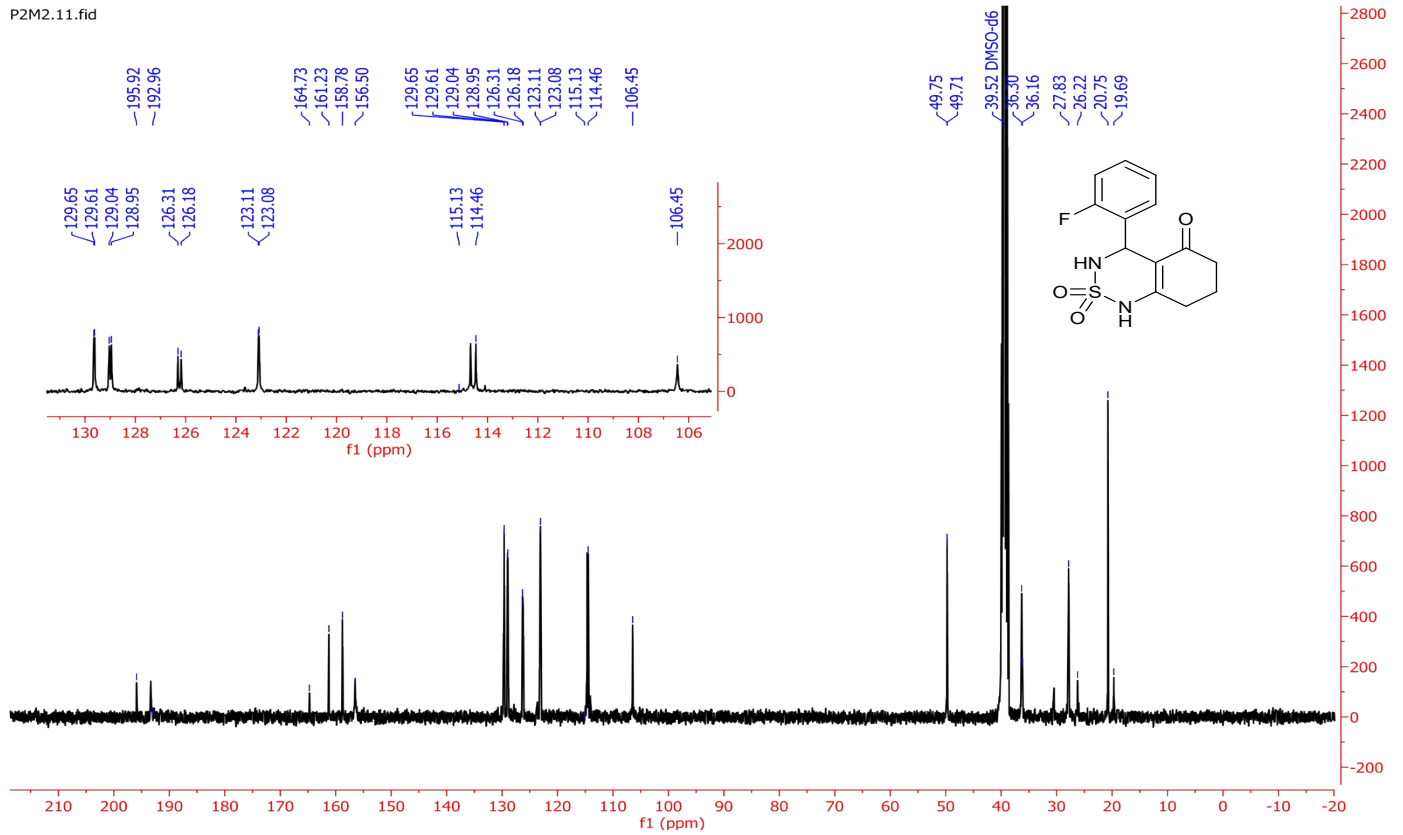

dioxide

**<sup>13</sup>C NMR Spectrum: 4-(2-fluorophenyl)-4,6,7,8-tetrahydro-1H-benzo[c][1,2,6]thiadiazin-5(3H)-one 2,2-dioxide**

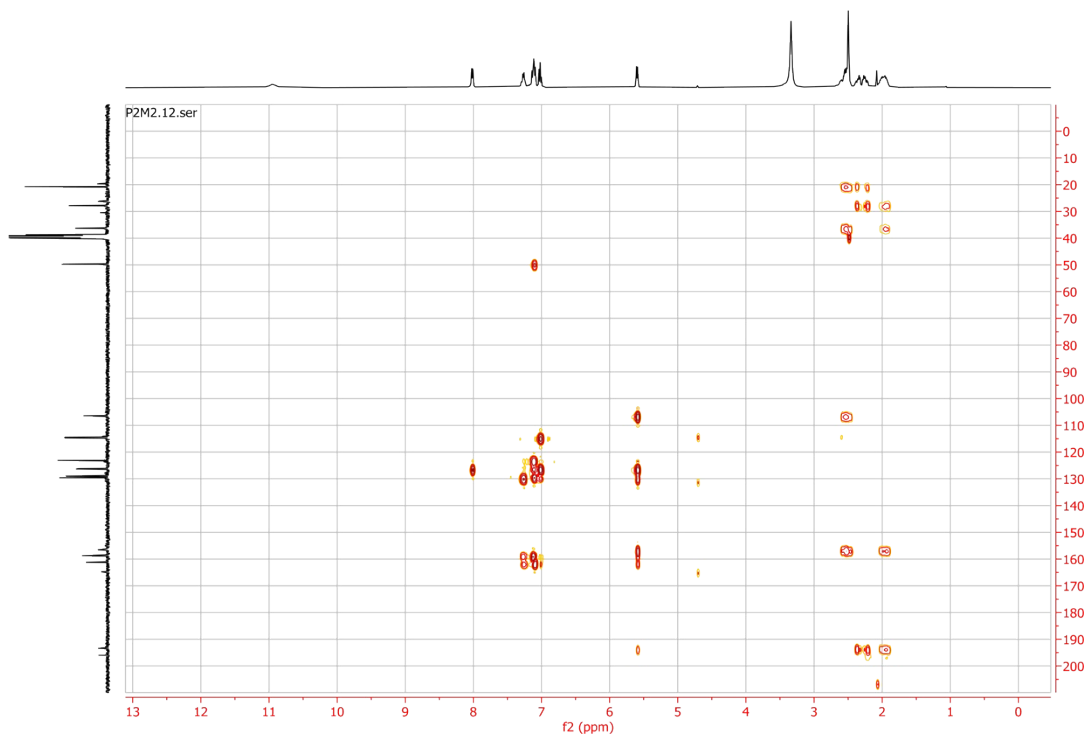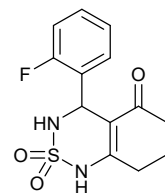

**HMBC Spectrum: 4-(2-fluorophenyl)-4,6,7,8-tetrahydro-1H-benzo[c][1,2,6]thiadiazin-5(3H)-one 2,2-dioxide**

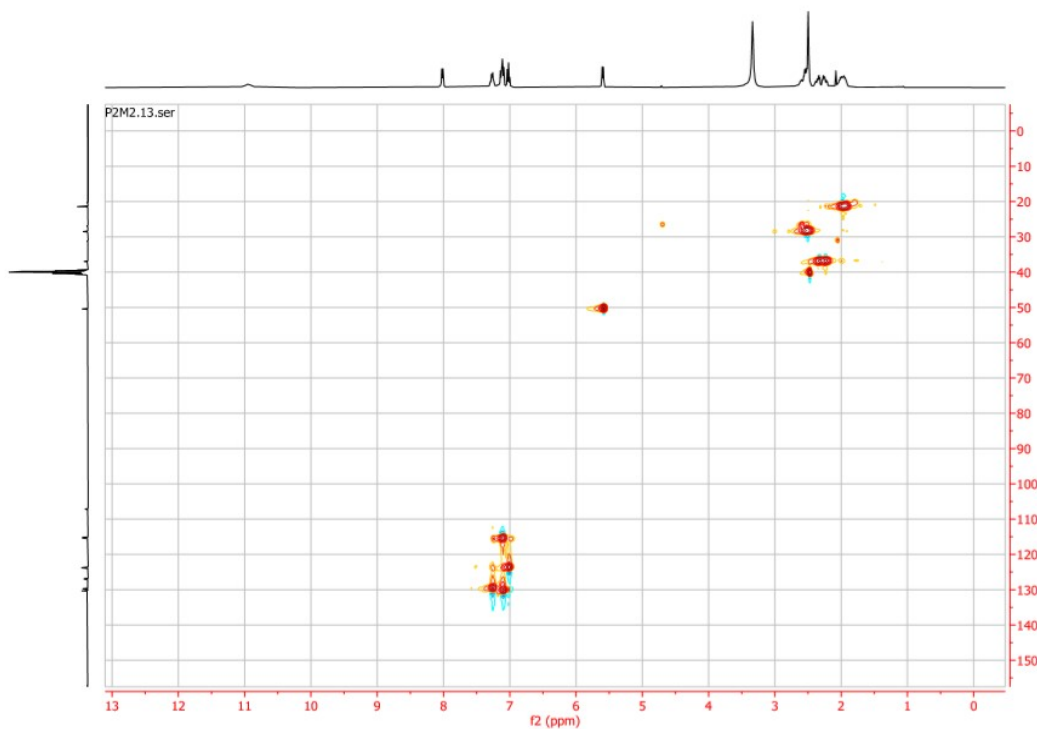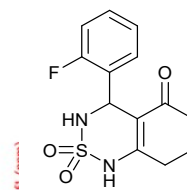

**HMQC Spectrum:** 4-(2-fluorophenyl)-4,6,7,8-tetrahydro-1H-benzo[c][1,2,6]thiadiazin-5(3H)-one 2,2-dioxide

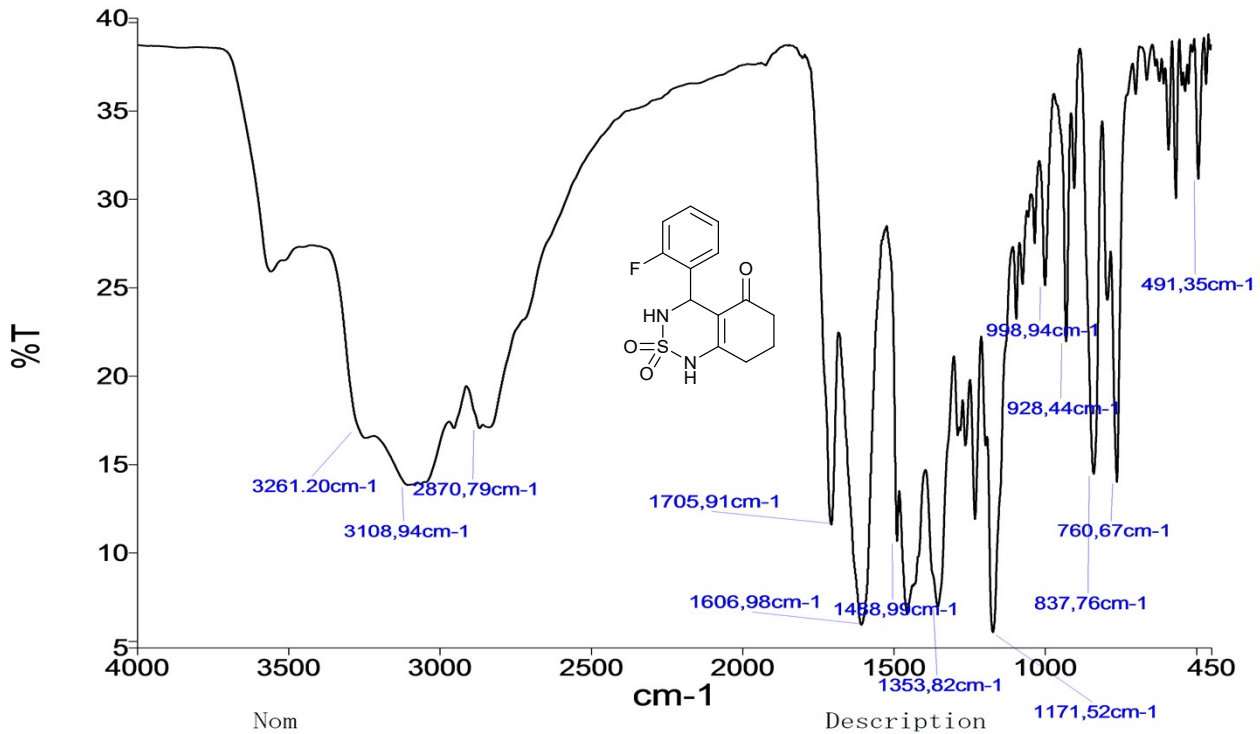

Administrator 141\_1\_1 Échantillon 141 Par Administrator Date jeudi, juillet 04 2019

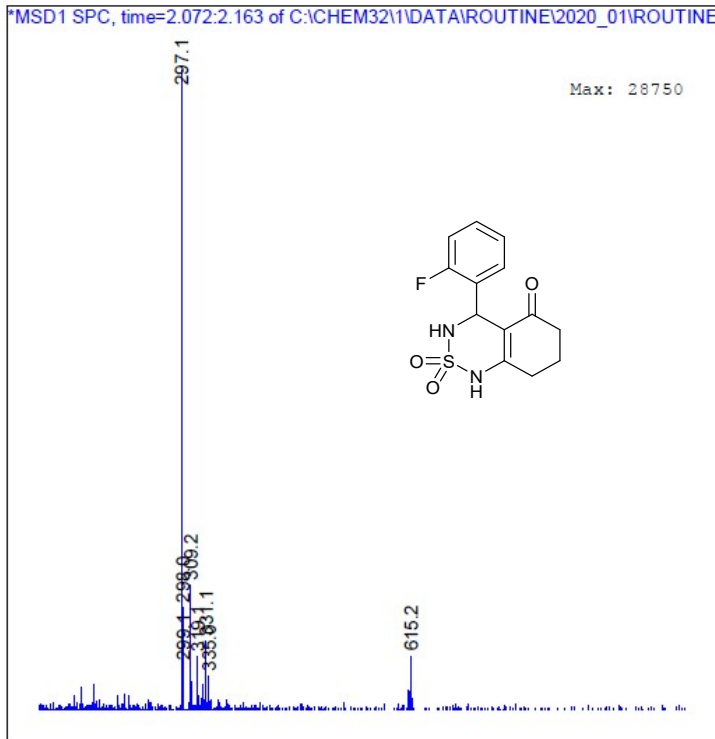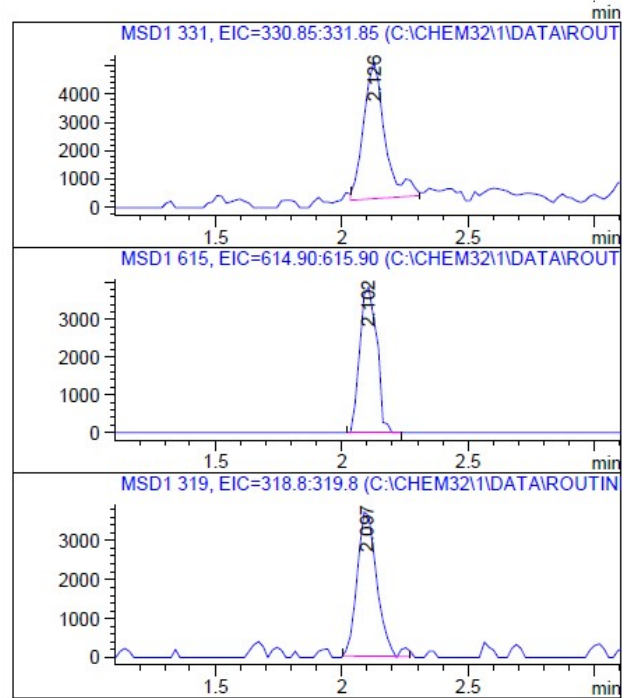

IR Spectrum: 4-(2-fluorophenyl)-4,6,7,8-tetrahydro-1H-benzo[c][1,2,6]thiadiazin-5(3H)-one 2,2-dioxide



LC-MS: 4-(2-fluorophenyl)-4,6,7,8-tetrahydro-1H-benzo[c][1,2,6]thiadiazin-5(3H)-one 2,2-dioxide

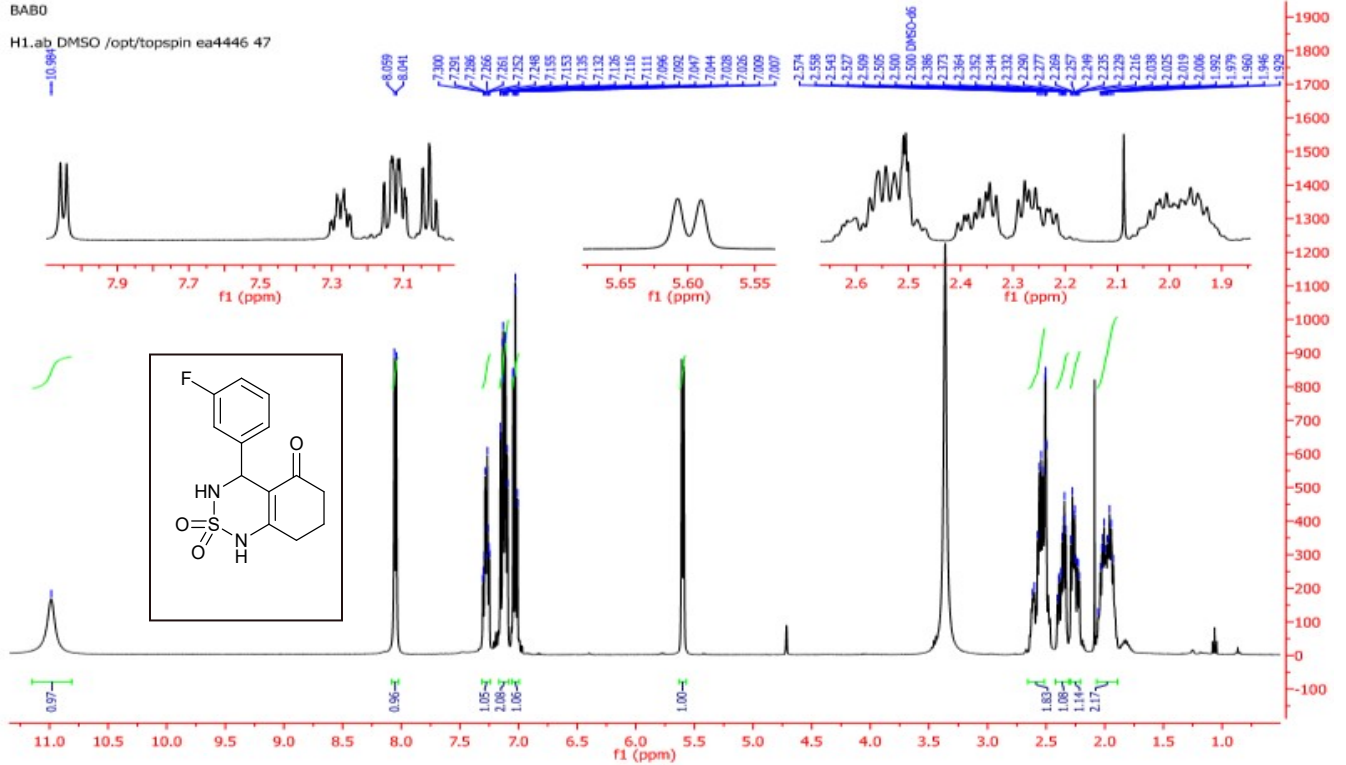

<sup>1</sup>H NMR Spectrum: 4-(3-fluorophenyl)-4,6,7,8-tetrahydro-1H-benzo[c][1,2,6]thiadiazin-5(3H)-one 2,2-dioxide

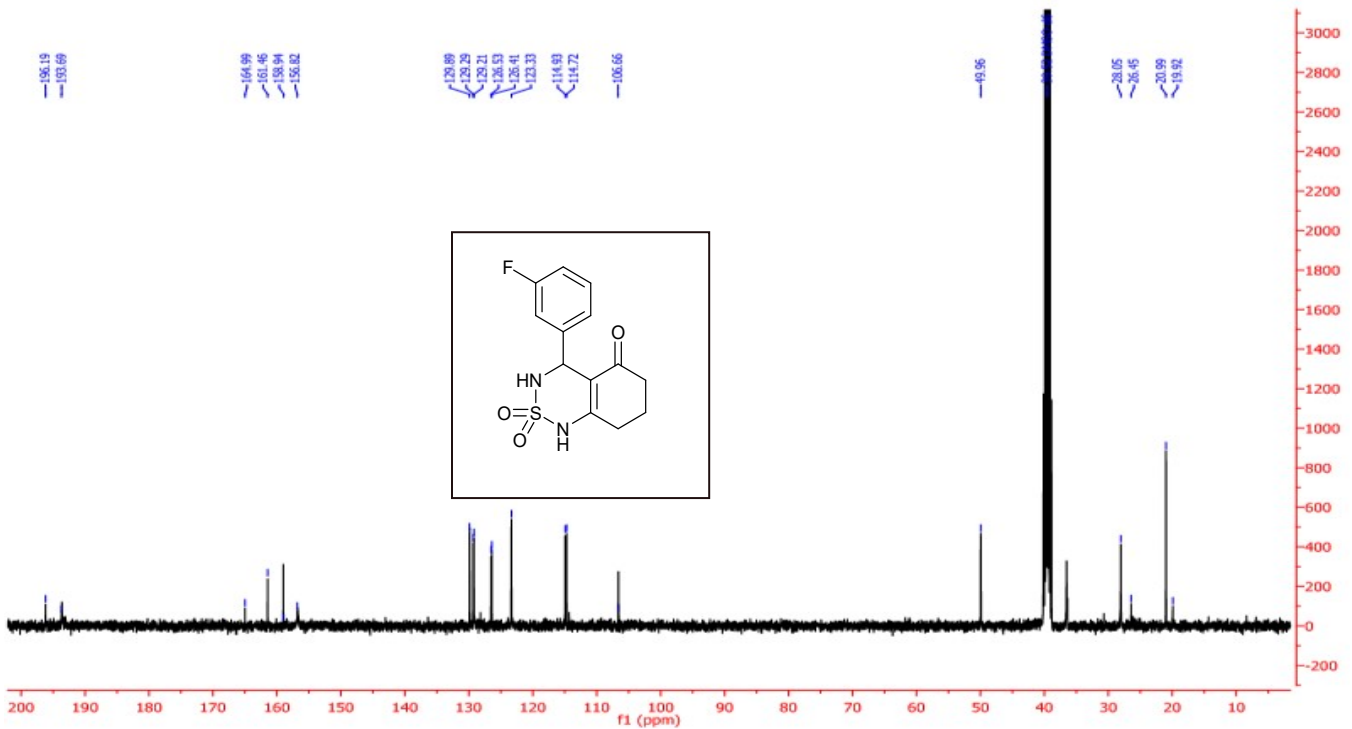

**<sup>13</sup>C NMR Spectrum: 4-(3-fluorophenyl)-4,6,7,8-tetrahydro-1H-benzo[c][1,2,6]thiadiazin-5(3H)-one 2,2-dioxide**

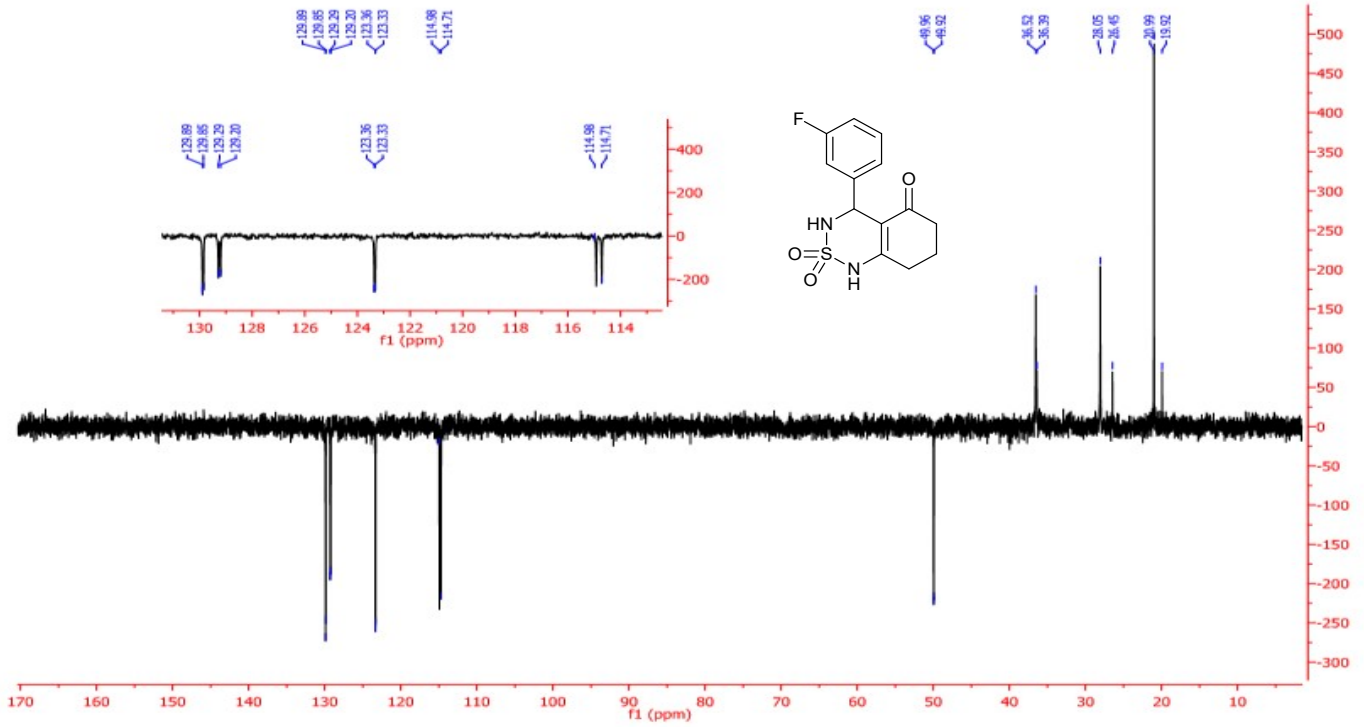

**DEPT NMR Spectrum: 4-(3-fluorophenyl)-4,6,7,8-tetrahydro-1H-benzo[c][1,2,6]thiadiazin-5(3H)-one 2,2-dioxide**

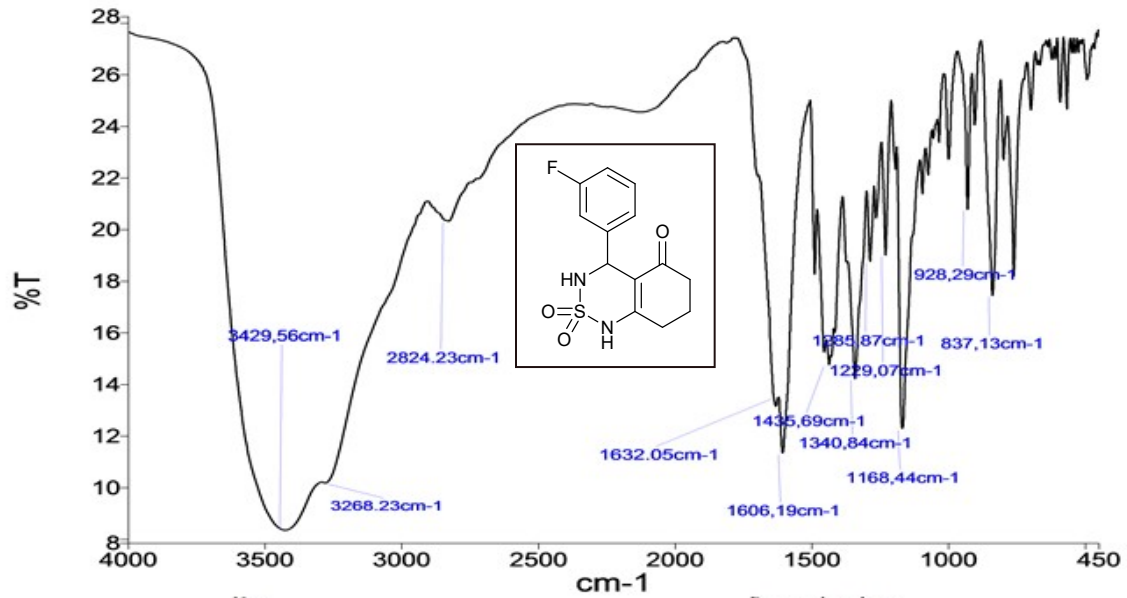

Nom: Administrator 143\_1\_1 Échantillon 143 Par Administrator Date jeudi, juillet 04 2019

dioxide

**IR Spectrum: 4-(3-fluorophenyl)-4,6,7,8-tetrahydro-1H-benzo[c][1,2,6]thiadiazin-5(3H)-one 2,2-dioxide**

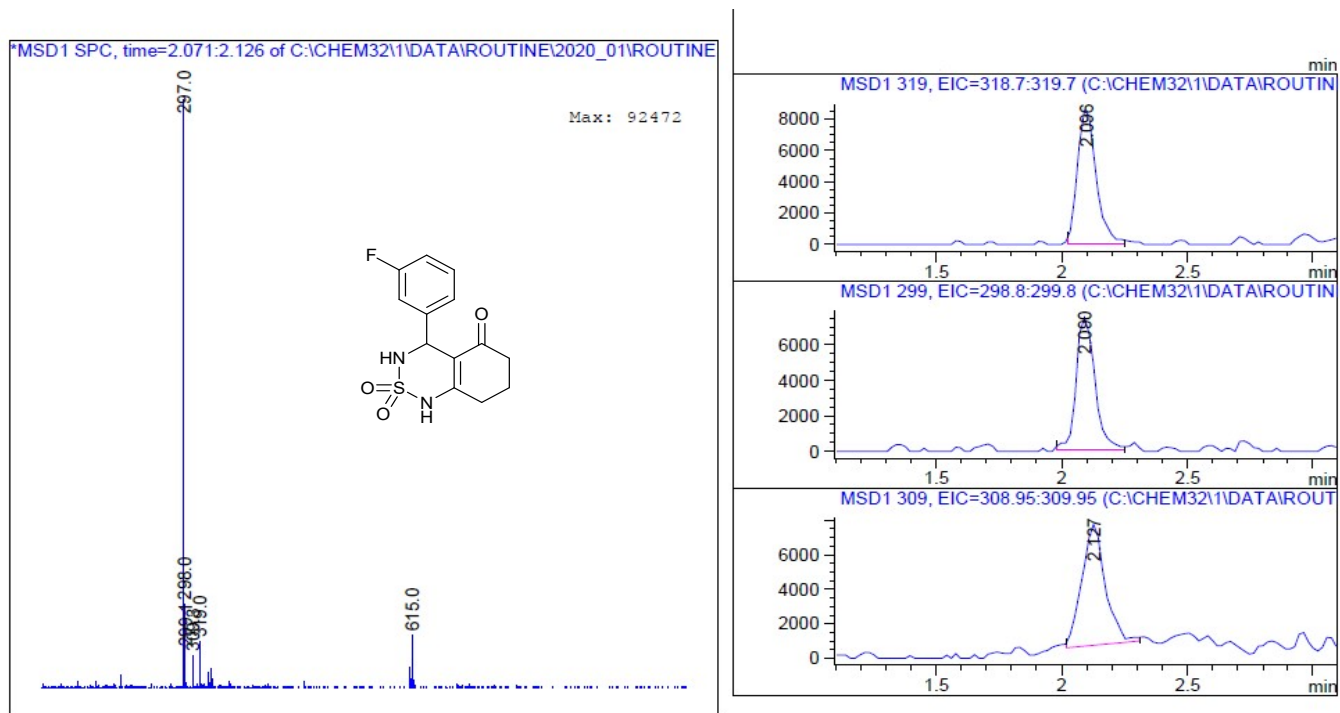

**LC-MS: 4-(3-fluorophenyl)-4,6,7,8-tetrahydro-1H-benzo[c][1,2,6]thiadiazin-5(3H)-one 2,2-dioxide**

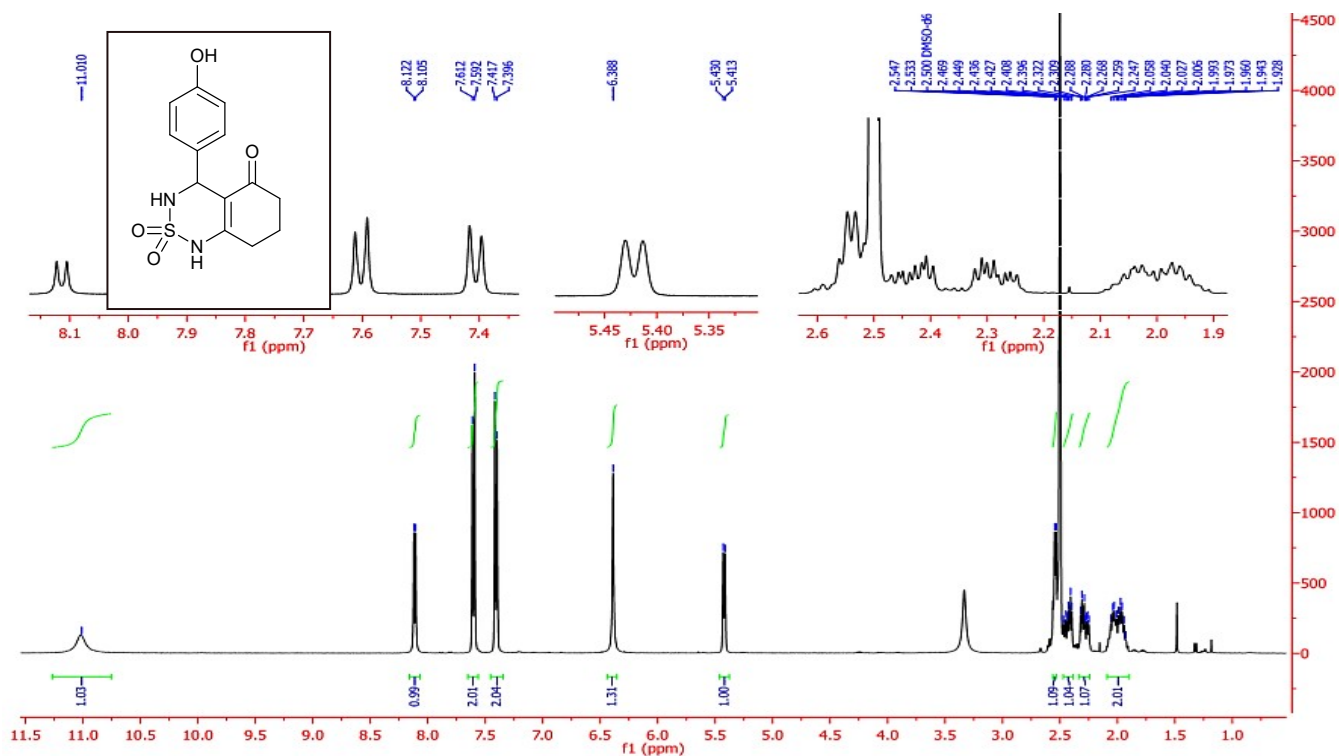

**1H NMR Spectrum: 4-(4-hydroxyphenyl)-4,6,7,8-tetrahydro-1H-benzo[c][1,2,6]thiadiazin-5(3H)-one 2,2-dioxide**

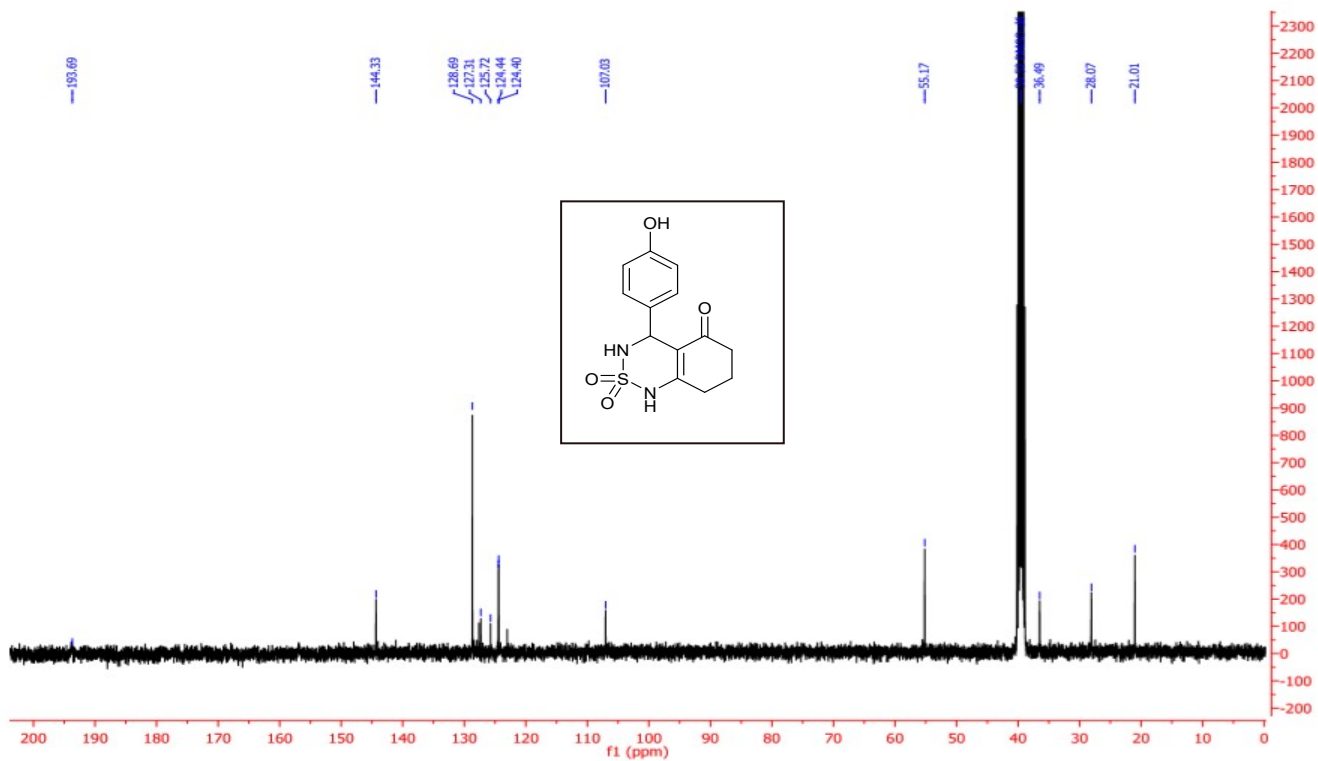

**<sup>13</sup>C NMR Spectrum:** 4-(4-hydroxyphenyl)-4,6,7,8-tetrahydro-1H-benzo[c][1,2,6]thiadiazin-5(3H)-one 2,2-dioxide

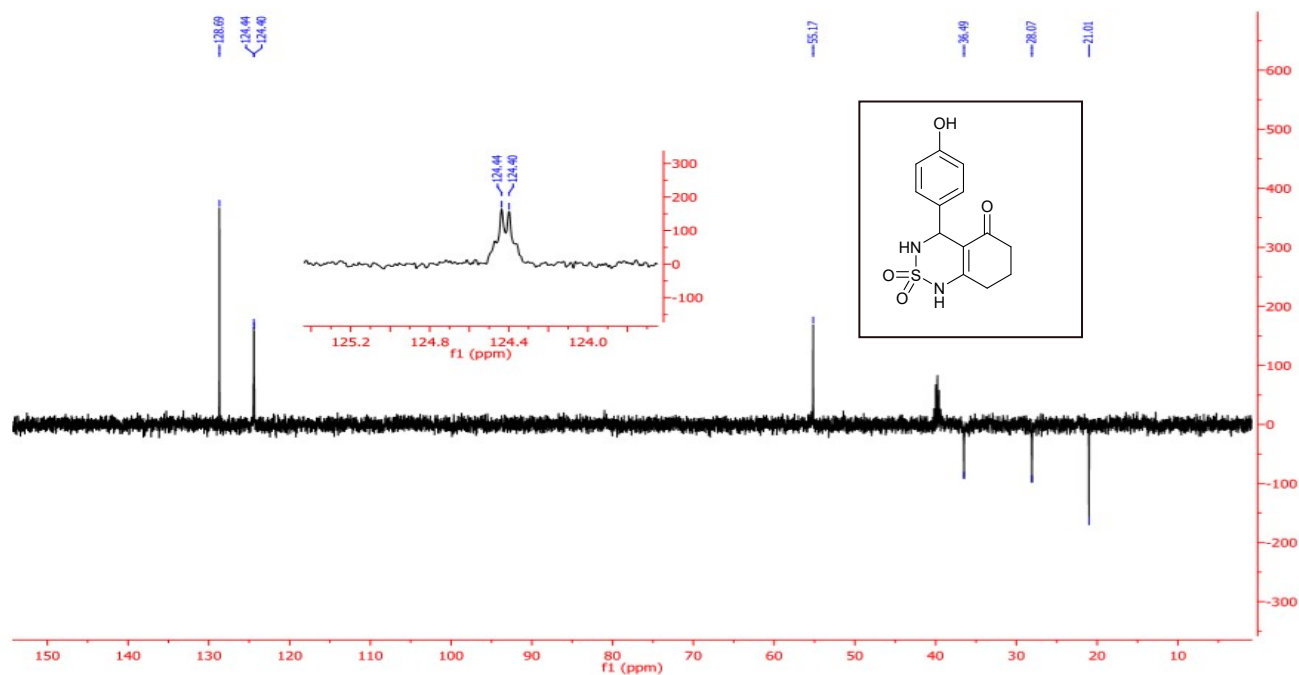

**DEPT NMR Spectrum:** 4-(4-hydroxyphenyl)-4,6,7,8-tetrahydro-1H-benzo[c][1,2,6]thiadiazin-5(3H)-one 2,2-dioxide

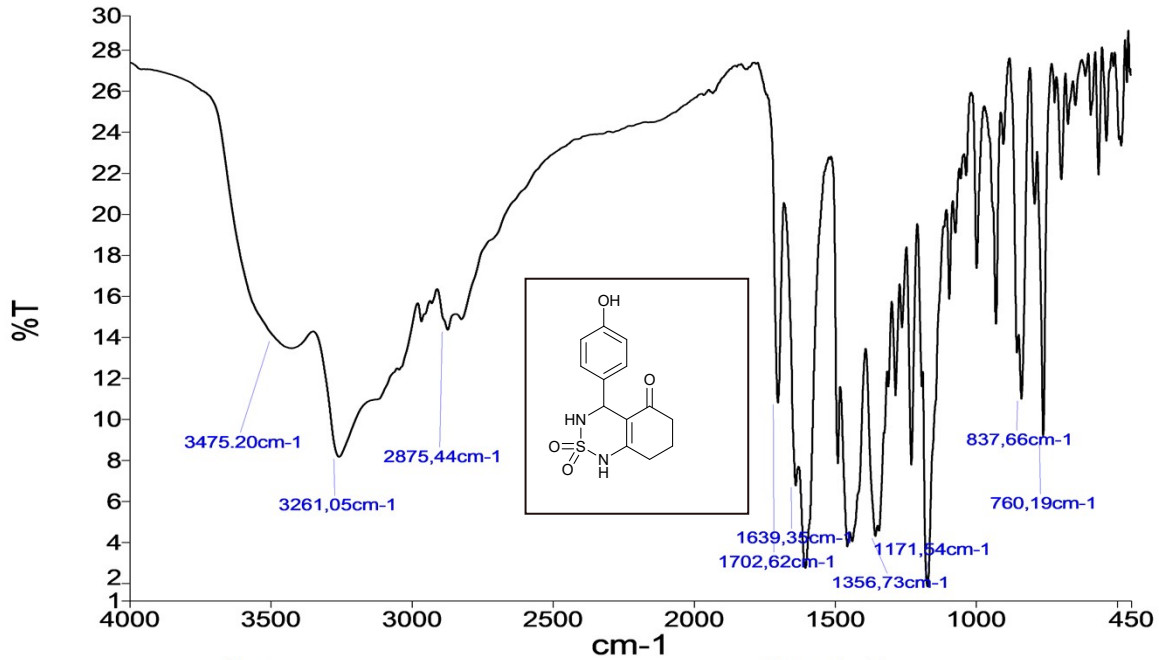

Nom Description  
 Administrateur 244\_1 Échantillon 244 Par Administrateur Date mercredi, janvier 22 2020  
**IR Spectrum: 4-(4-hydroxyphenyl)-4,6,7,8-tetrahydro-1H-benzo[c][1,2,6]thiadiazin-5(3H)-one 2,2-dioxide**

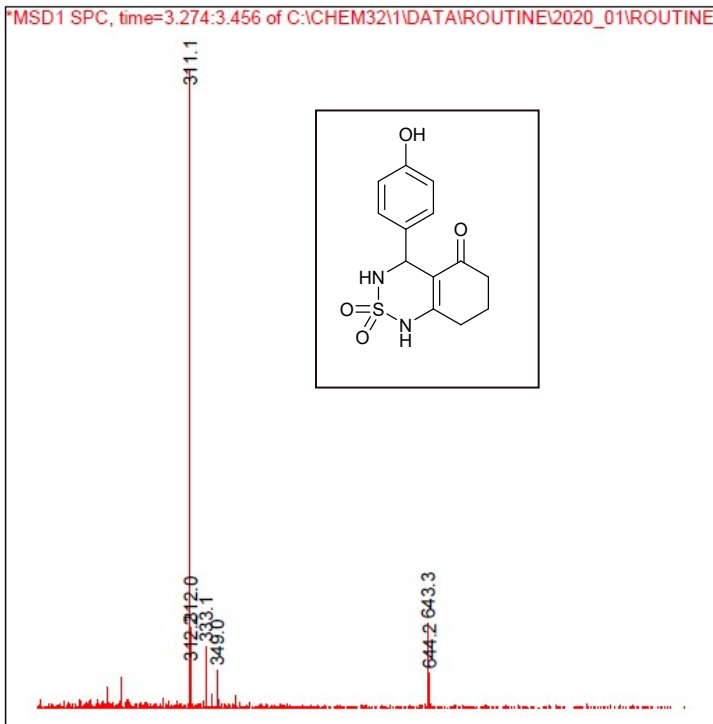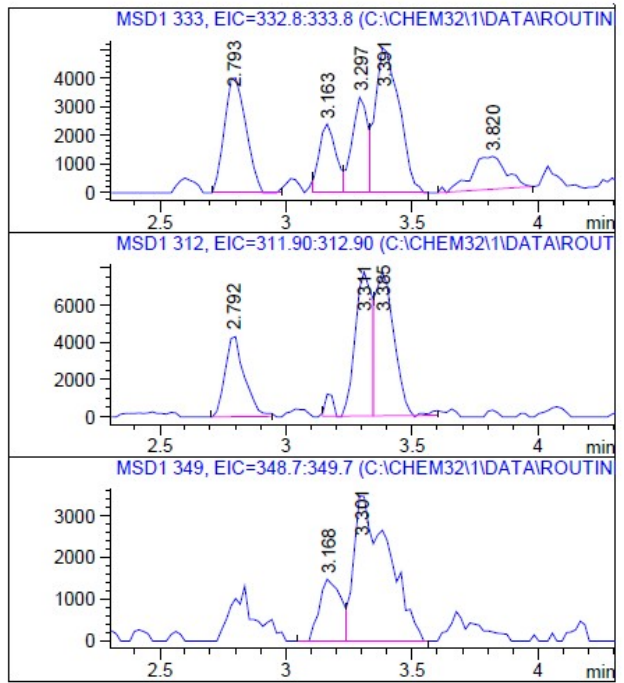

**LC-MS: 4-(4-hydroxyphenyl)-4,6,7,8-tetrahydro-1H-benzo[c][1,2,6]thiadiazin-5(3H)-one 2,2-dioxide**



H1.lab DMSO /opt/topspin ea4446 27

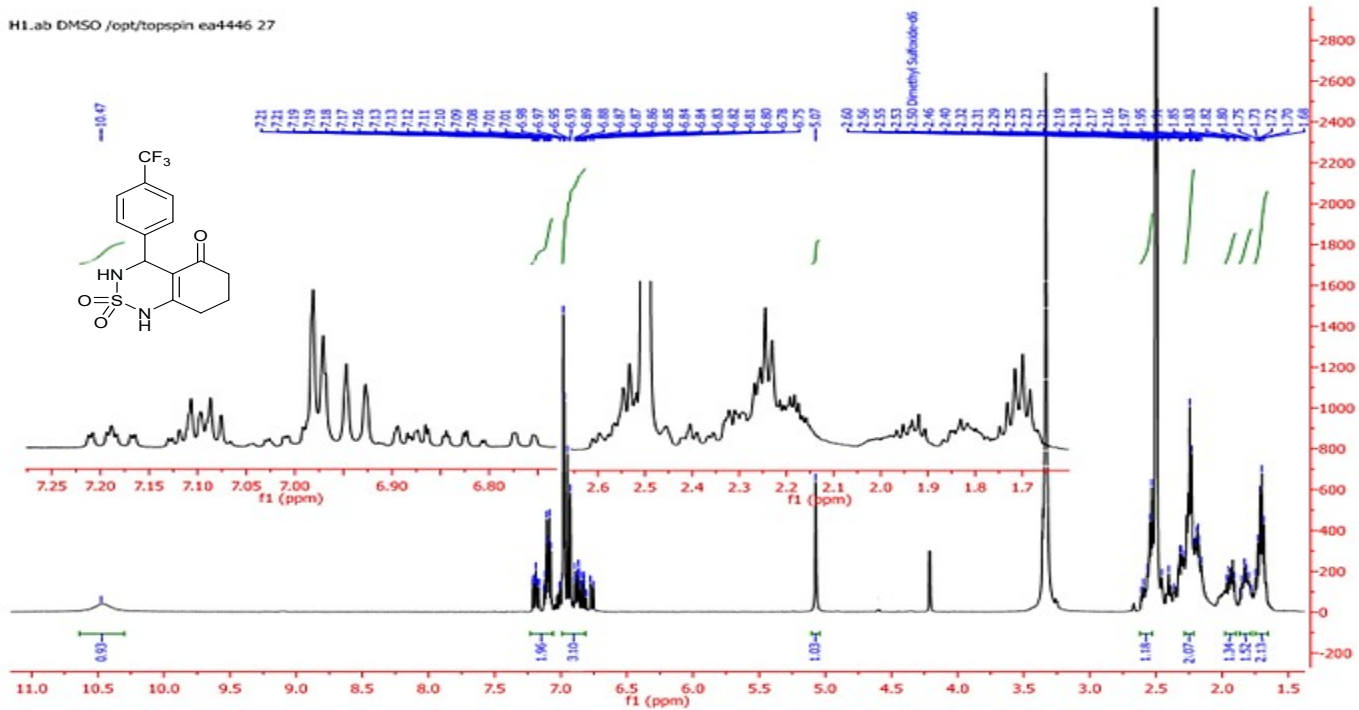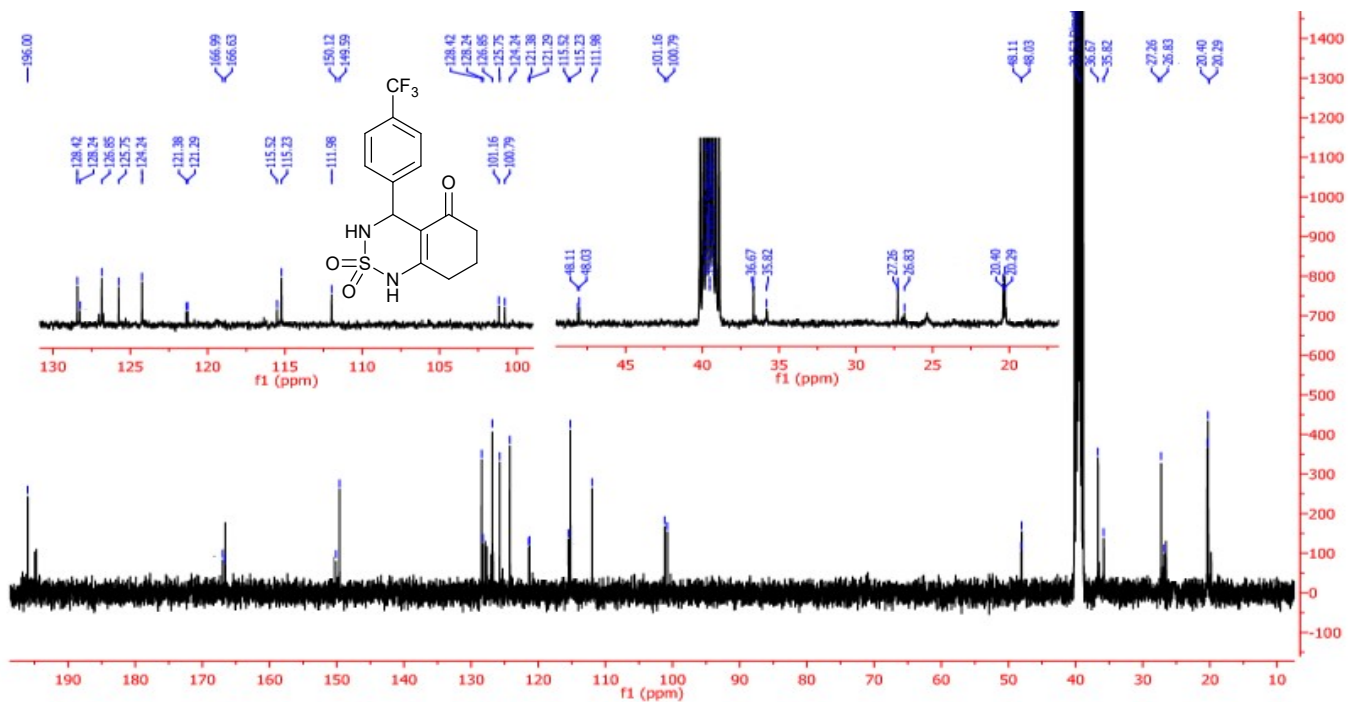

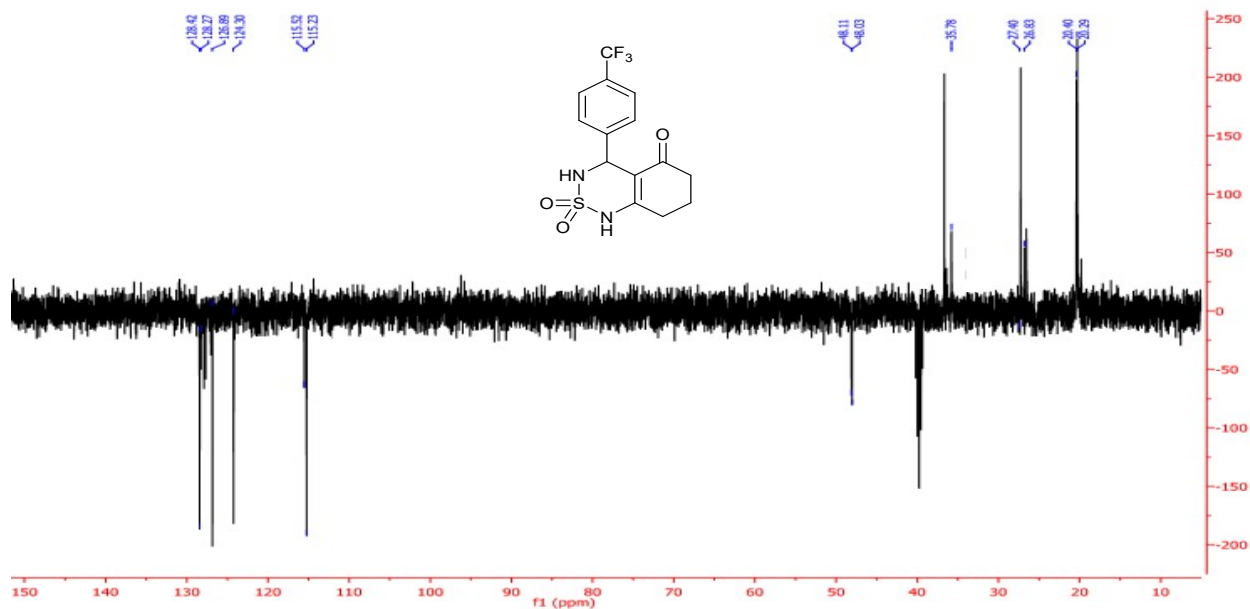

**DEPT NMR Spectrum:** 4-(4-(trifluoromethyl)phenyl)-4,6,7,8-tetrahydro-1H-benzo[c][1,2,6]thiadiazin-

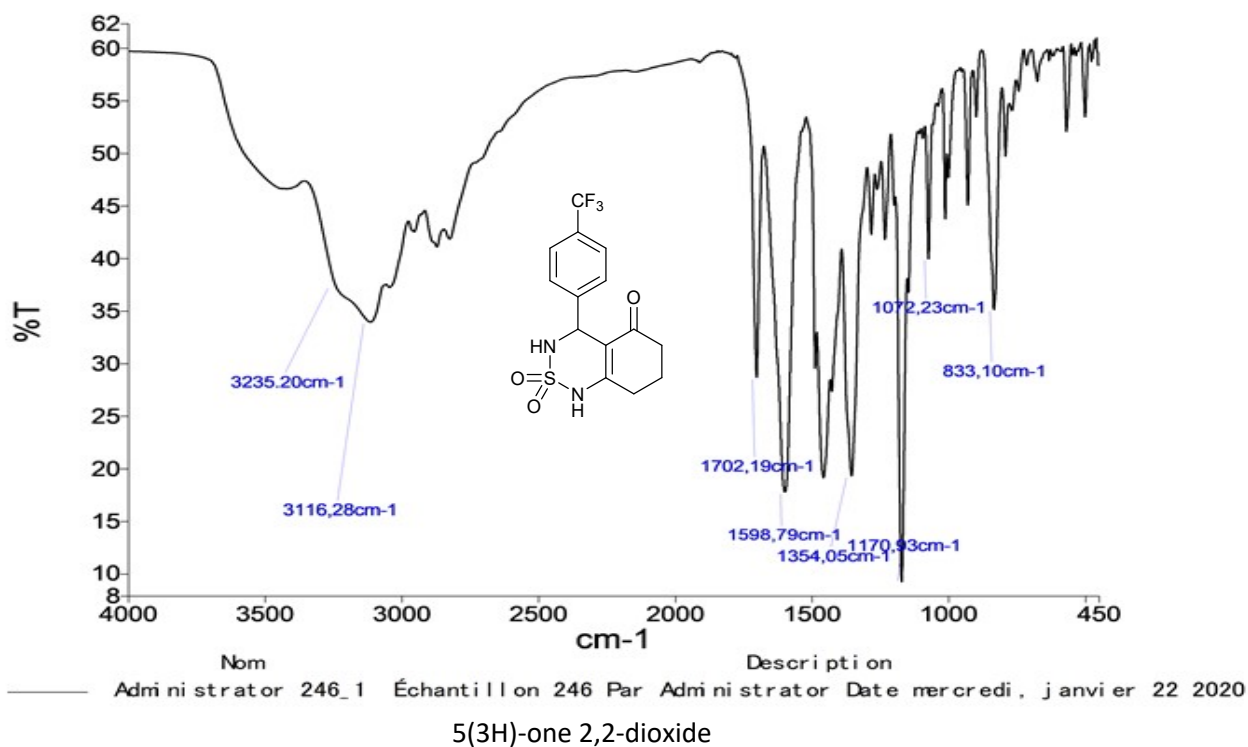

**IR Spectrum:** 4-(4-(trifluoromethyl)phenyl)-4,6,7,8-tetrahydro-1H-benzo[c][1,2,6]thiadiazin-5(3H)-one 2,2-dioxide

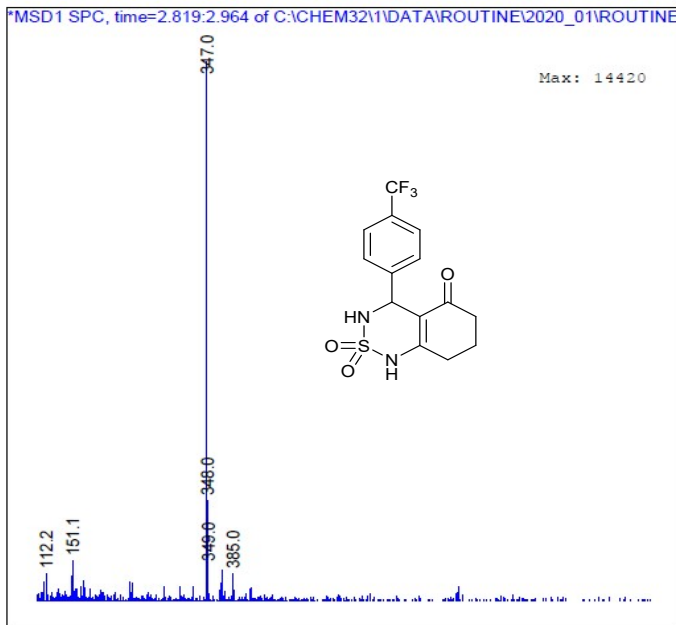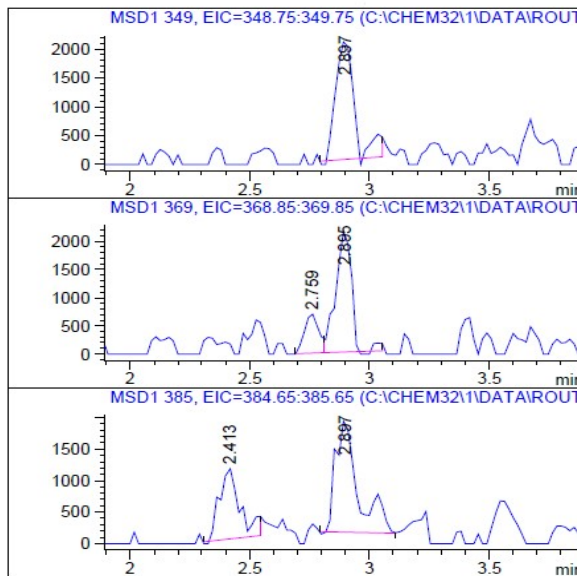

LC-MS: 4-(4-(trifluoromethyl)phenyl)-4,6,7,8-tetrahydro-1H-benzo[c][1,2,6]thiadiazin-5(3H)-one 2,2-dioxide

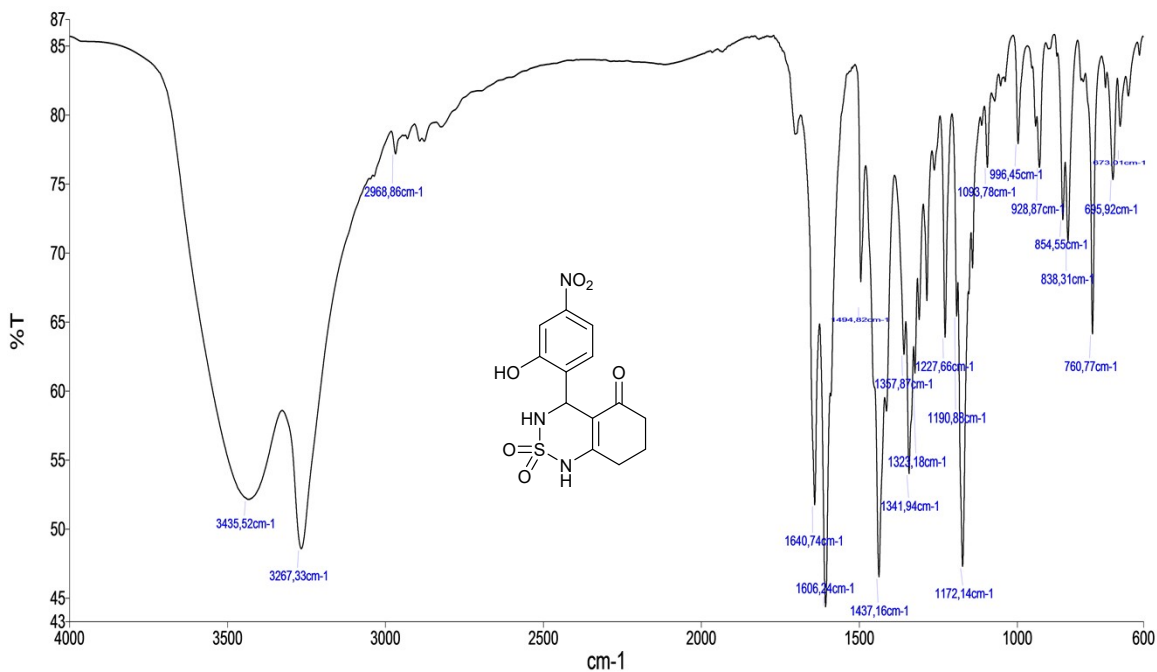

IR Spectrum: 4-(4-bromophenyl)-4,6,7,8-tetrahydro-1H-benzo[c][1,2,6]thiadiazin-5(3H)-one 2,2-dioxide



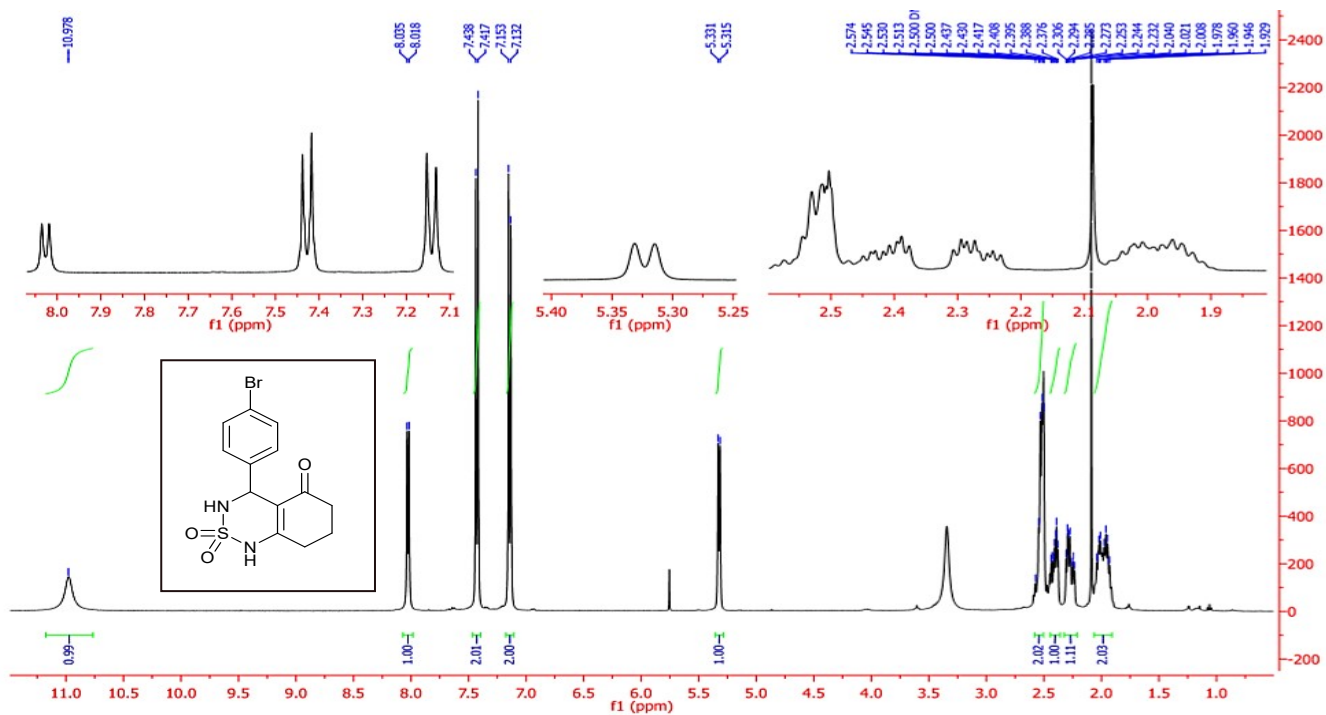

**<sup>1</sup>H NMR Spectrum: 4-(4-bromophenyl)-4,6,7,8-tetrahydro-1H-benzo[c][1,2,6]thiadiazin-5(3H)-one 2,2-dioxide**

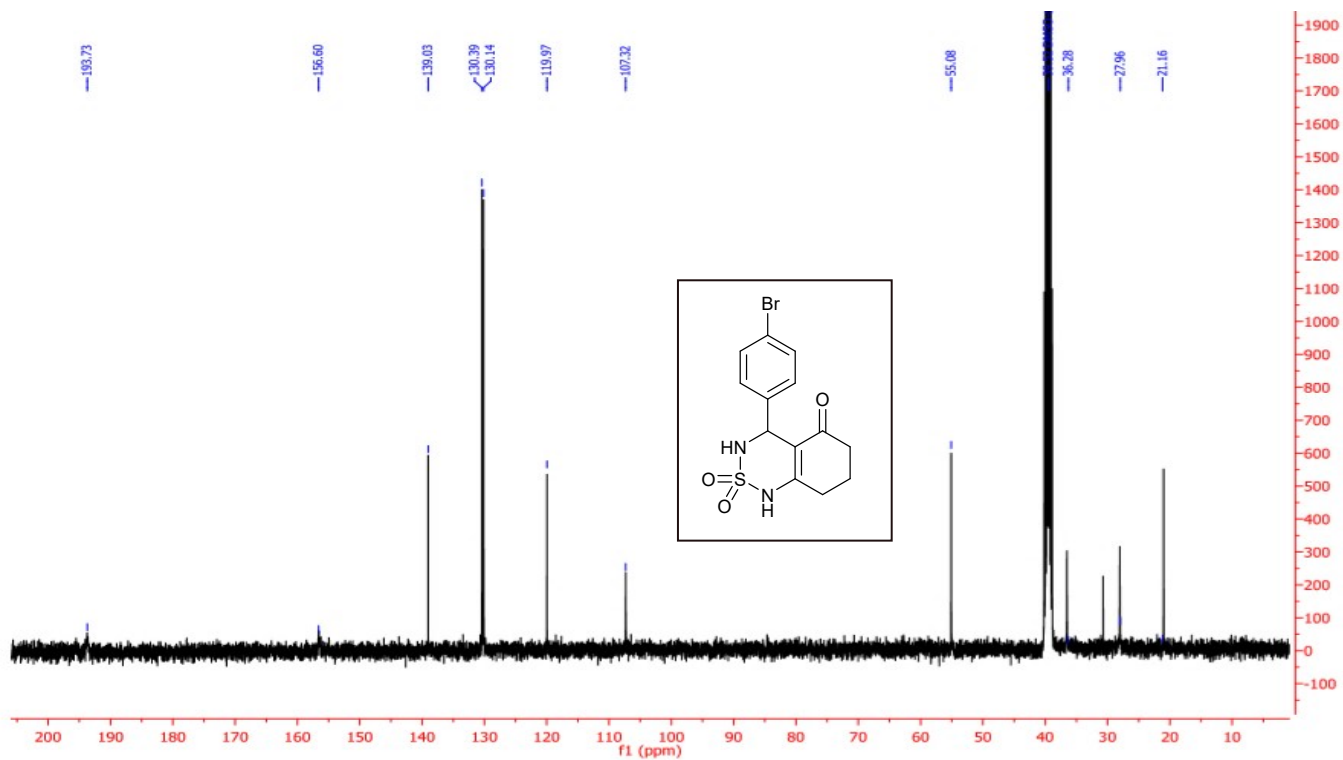

**<sup>13</sup>C NMR Spectrum: 4-(4-bromophenyl)-4,6,7,8-tetrahydro-1H-benzo[c][1,2,6]thiadiazin-5(3H)-one 2,2-dioxide**

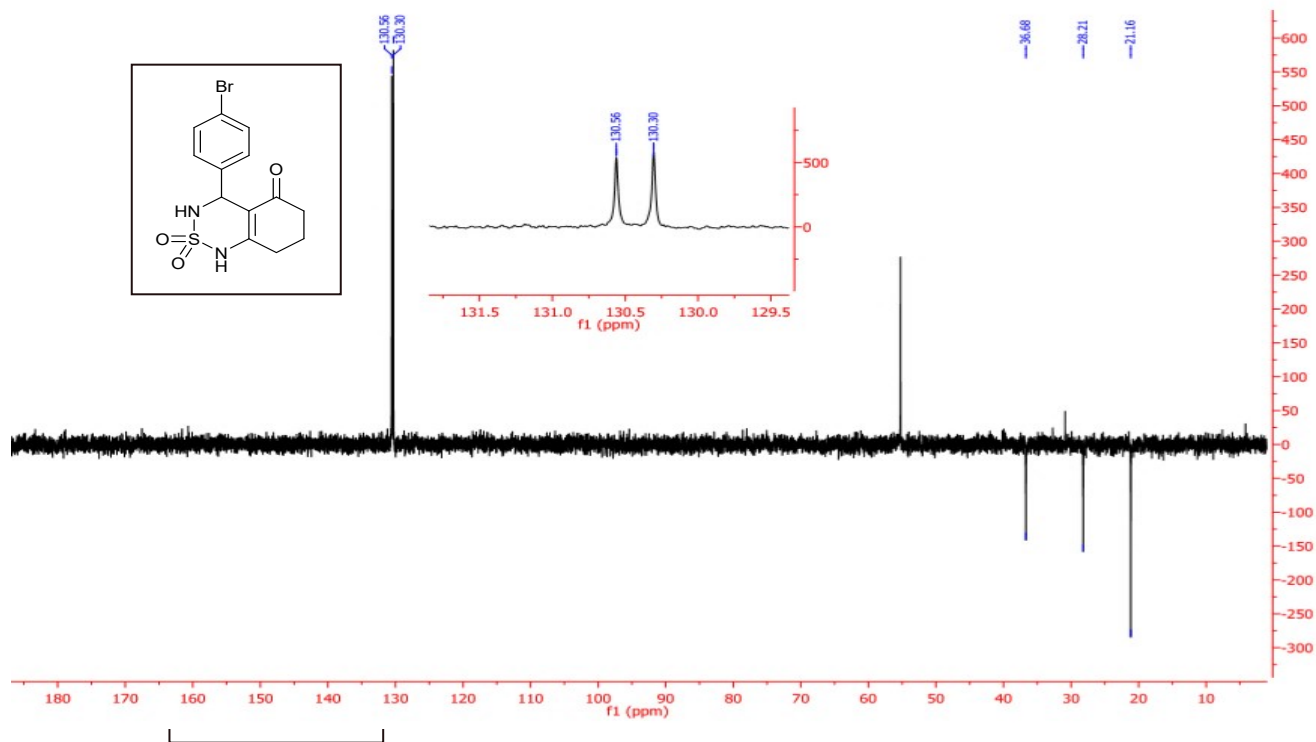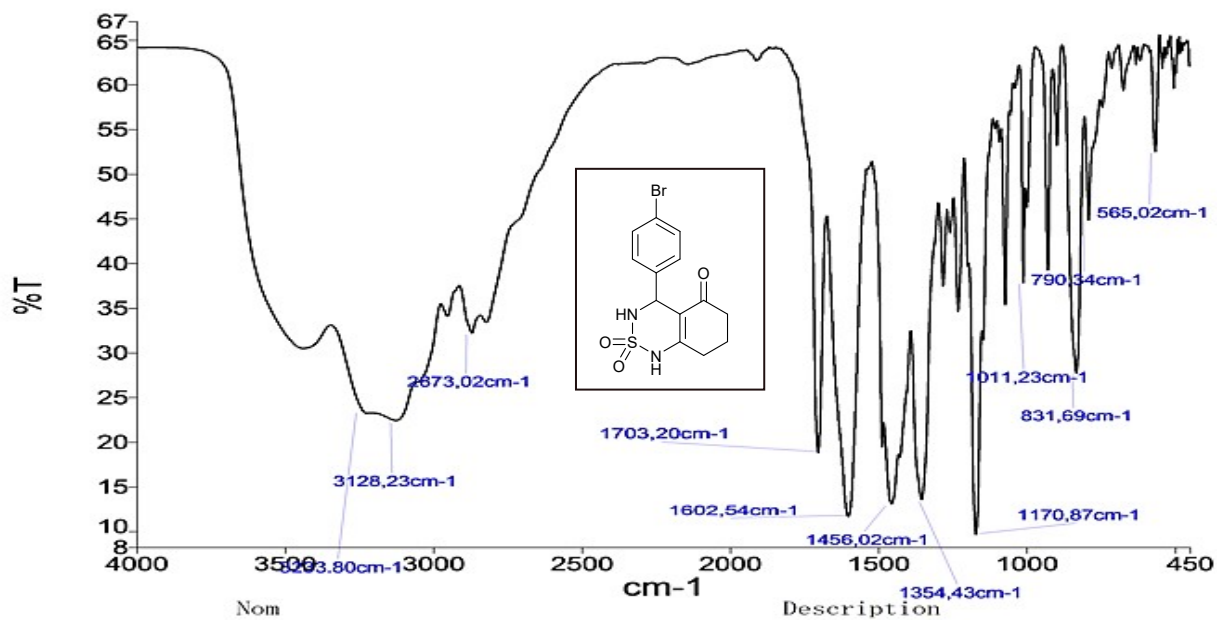

Administrator 142\_1 Échantillon 142 Par Administrator Date jeudi, juillet 04 2019

IR Spectrum: 4-(4-bromophenyl)-4,6,7,8-tetrahydro-1H-benzo[c][1,2,6]thiadiazin-5(3H)-one 2,2-dioxide

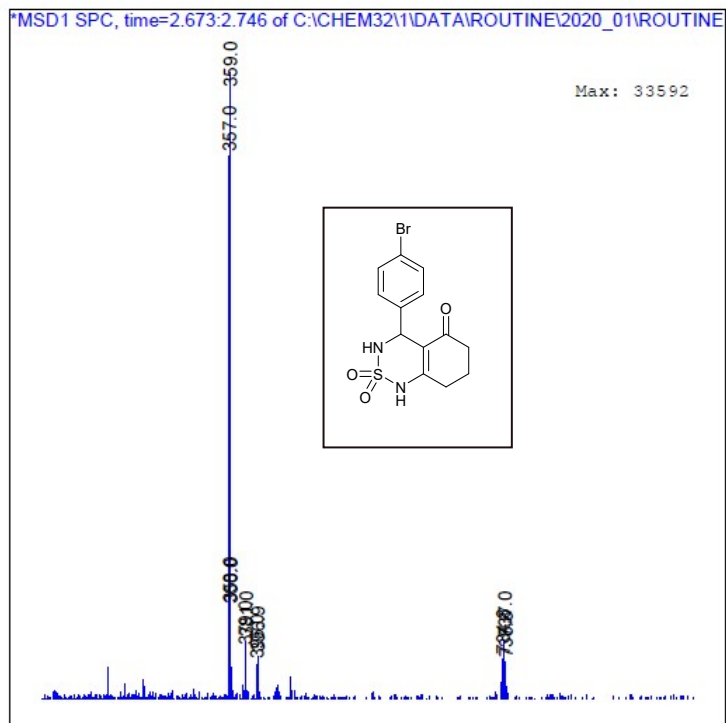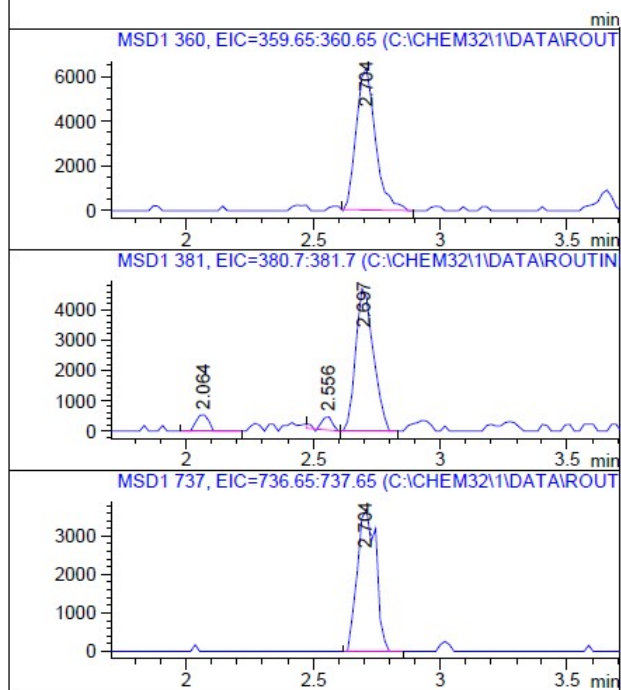

LC-MS: 4-(4-bromophenyl)-4,6,7,8-tetrahydro-1H-benzo[c][1,2,6]thiadiazin-5(3H)-one 2,2-dioxide

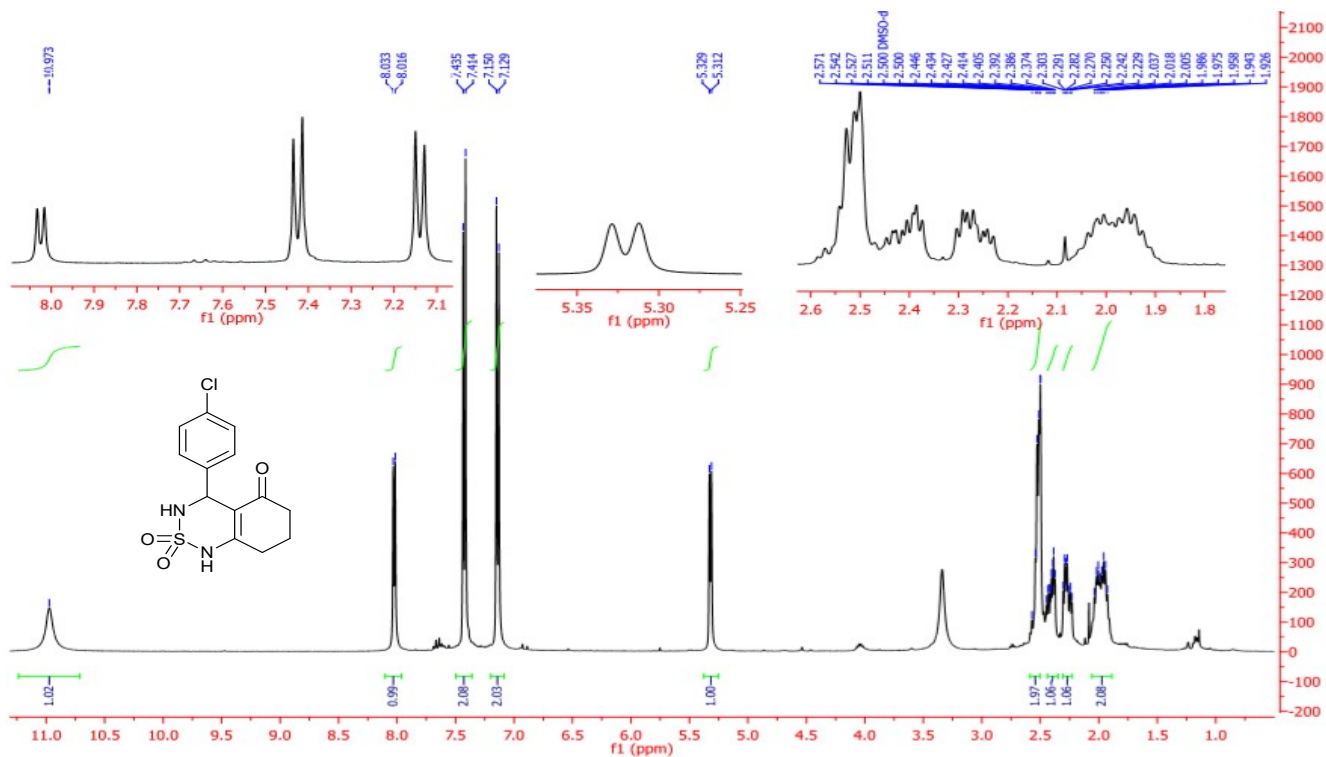

**<sup>1</sup>H NMR Spectrum: 4-(4-chlorophenyl)-4,6,7,8-tetrahydro-1H-benzo[c][1,2,6]thiadiazin-5(3H)-one 2,2-**

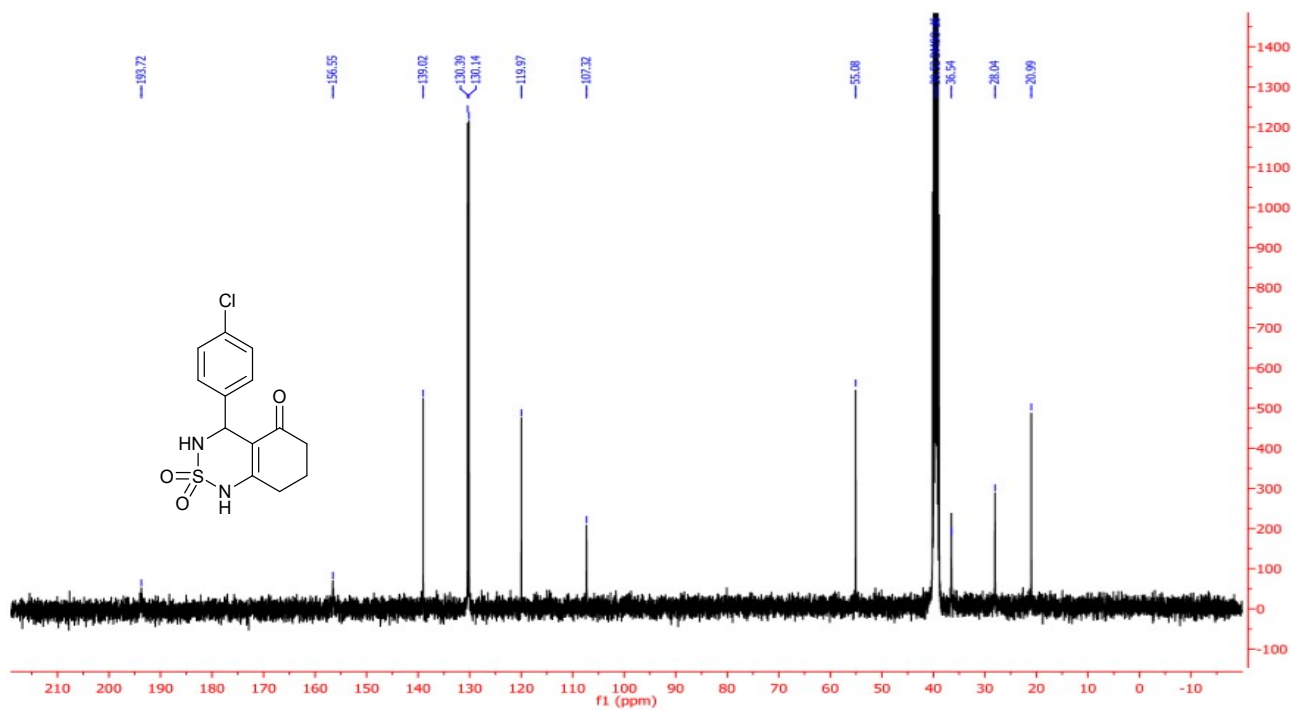

dioxide

**<sup>13</sup>C NMR Spectrum: 4-(4-chlorophenyl)-4,6,7,8-tetrahydro-1H-benzo[c][1,2,6]thiadiazin-5(3H)-one 2,2-dioxide**

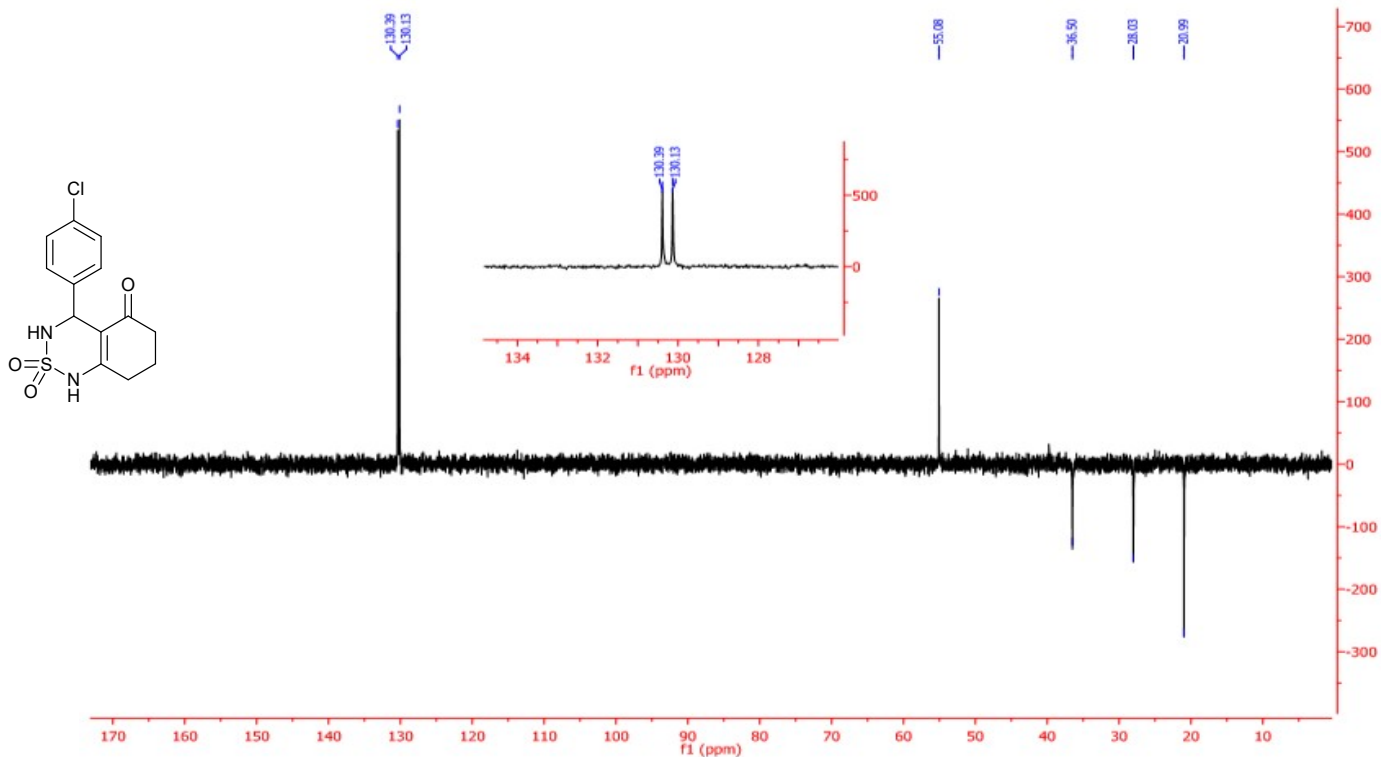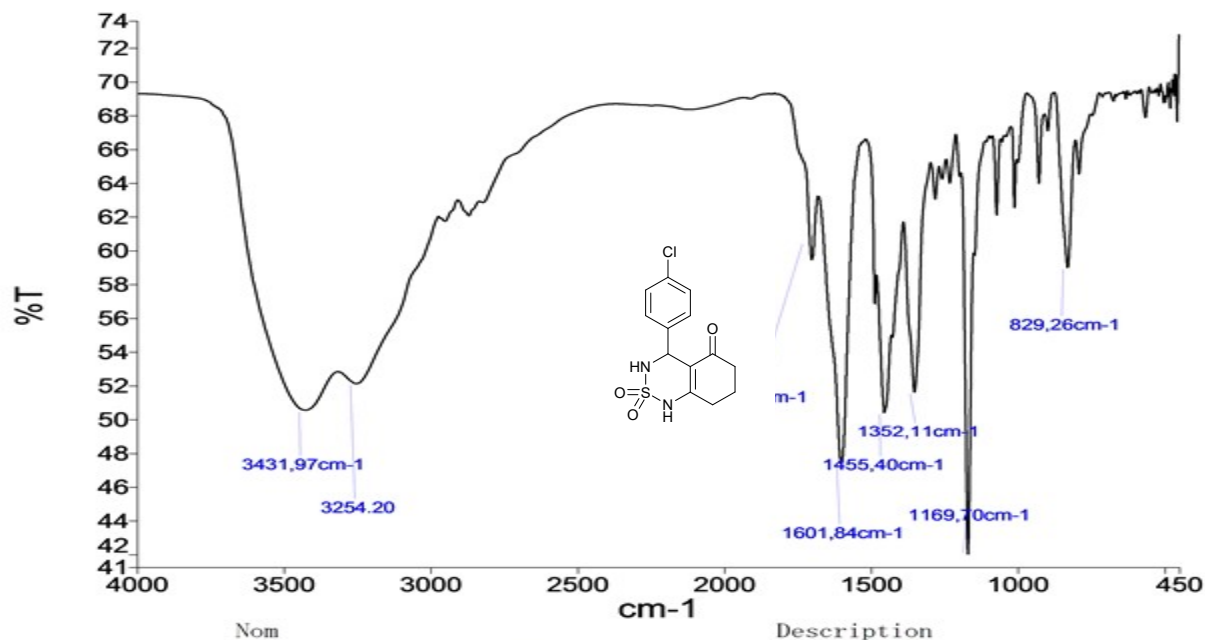

Nom Administrator 139\_1 Échantillon 139 Par Administrator Date jeudi, juillet 04 2019

IR Spectrum: 4-(4-chlorophenyl)-4,6,7,8-tetrahydro-1H-benzo[c][1,2,6]thiadiazin-5(3H)-one 2,2-dioxide

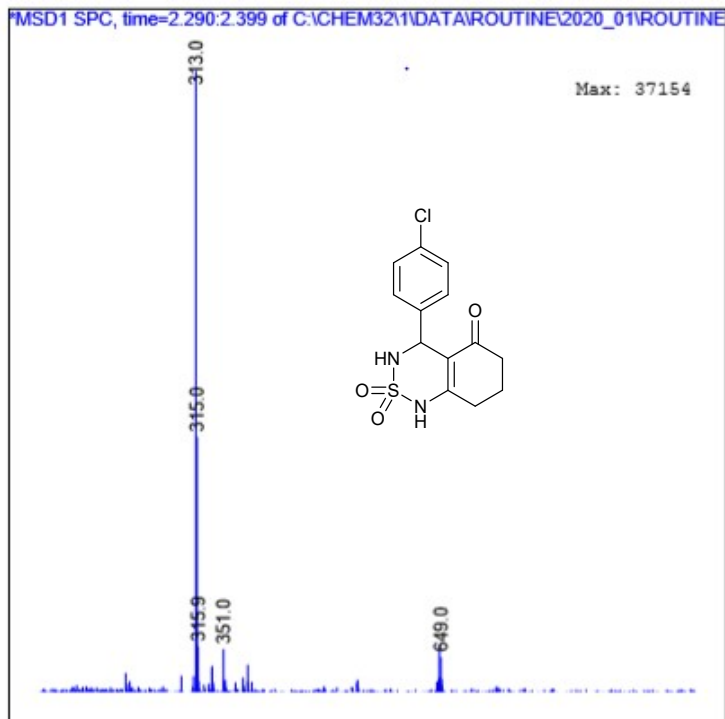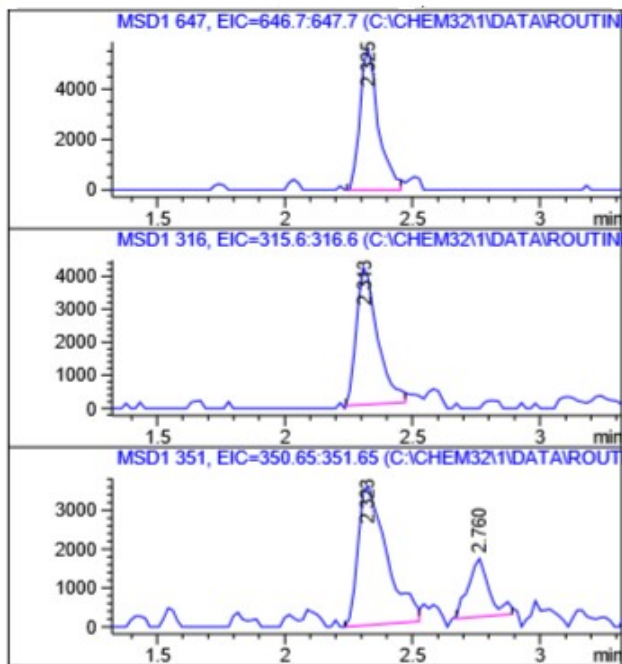

LC-MS: 4-(4-chlorophenyl)-4,6,7,8-tetrahydro-1H-benzo[c][1,2,6]thiadiazin-5(3H)-one 2,2-dioxide

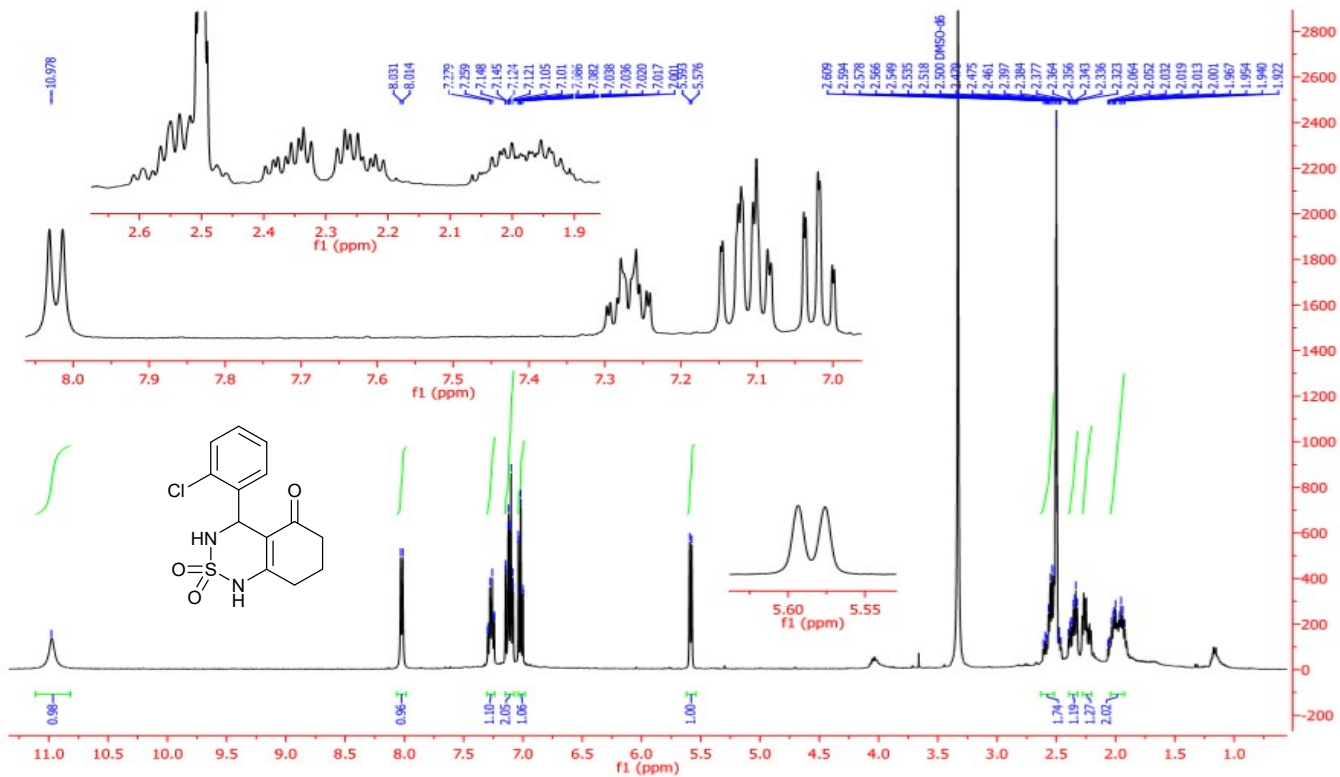

<sup>1</sup>H NMR Spectrum: 4-(4-bromophenyl)-4,6,7,8-tetrahydro-1H-benzo[c][1,2,6]thiadiazin-5(3H)-one 2,2-dioxide



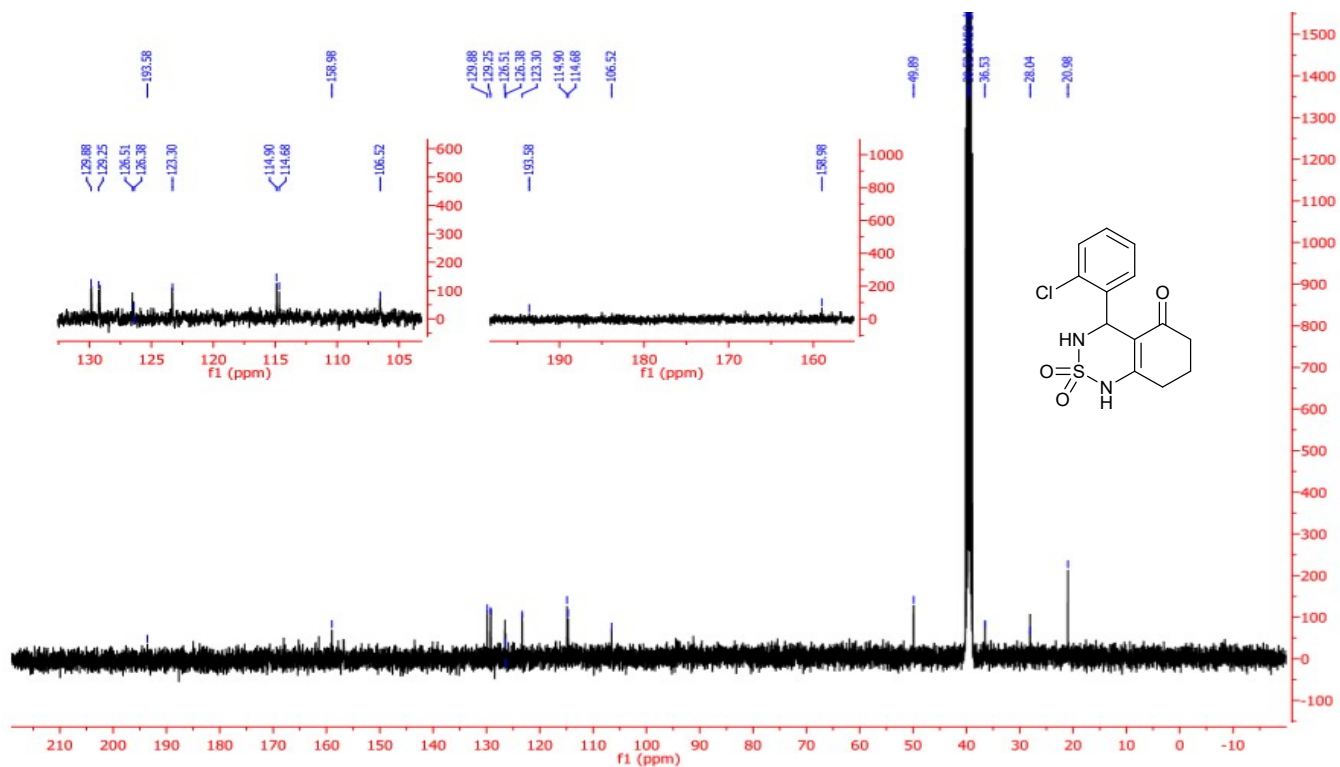

$^{13}\text{C}$  NMR Spectrum: 4-(4-bromophenyl)-4,6,7,8-tetrahydro-1H-benzo[c][1,2,6]thiadiazin-5(3H)-one 2,2-dioxide

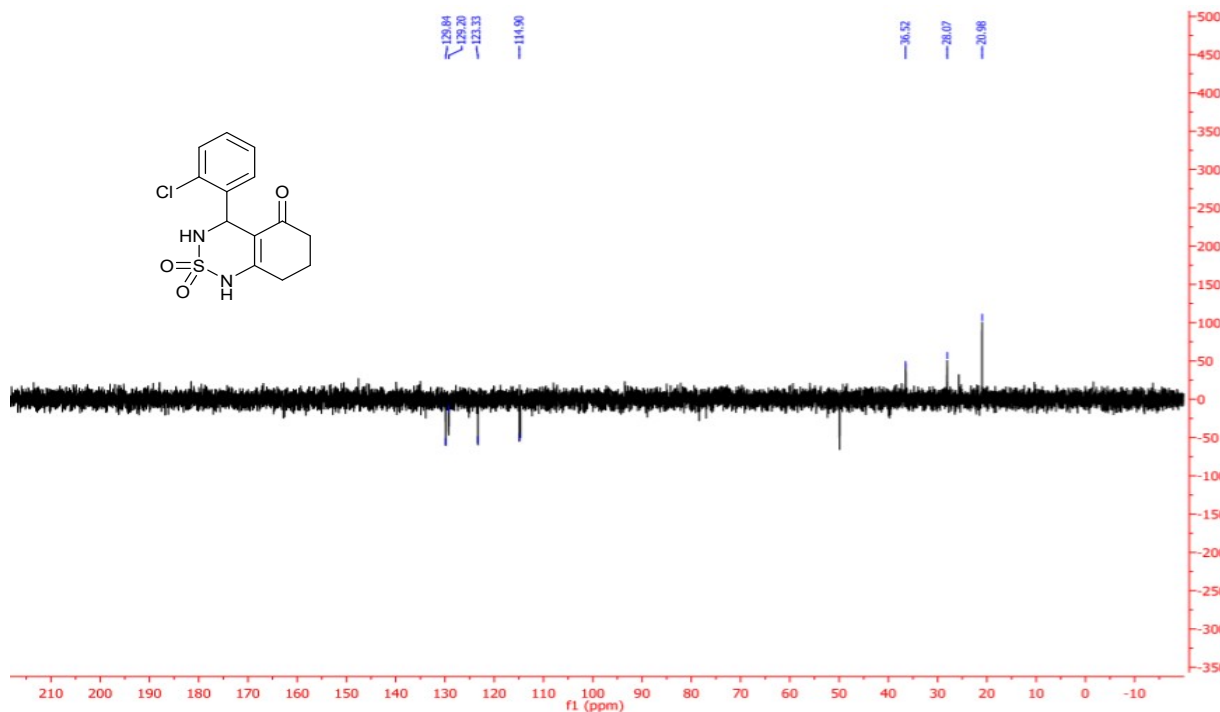

DEPT NMR Spectrum: 4-(4-bromophenyl)-4,6,7,8-tetrahydro-1H-benzo[c][1,2,6]thiadiazin-5(3H)-one 2,2-dioxide

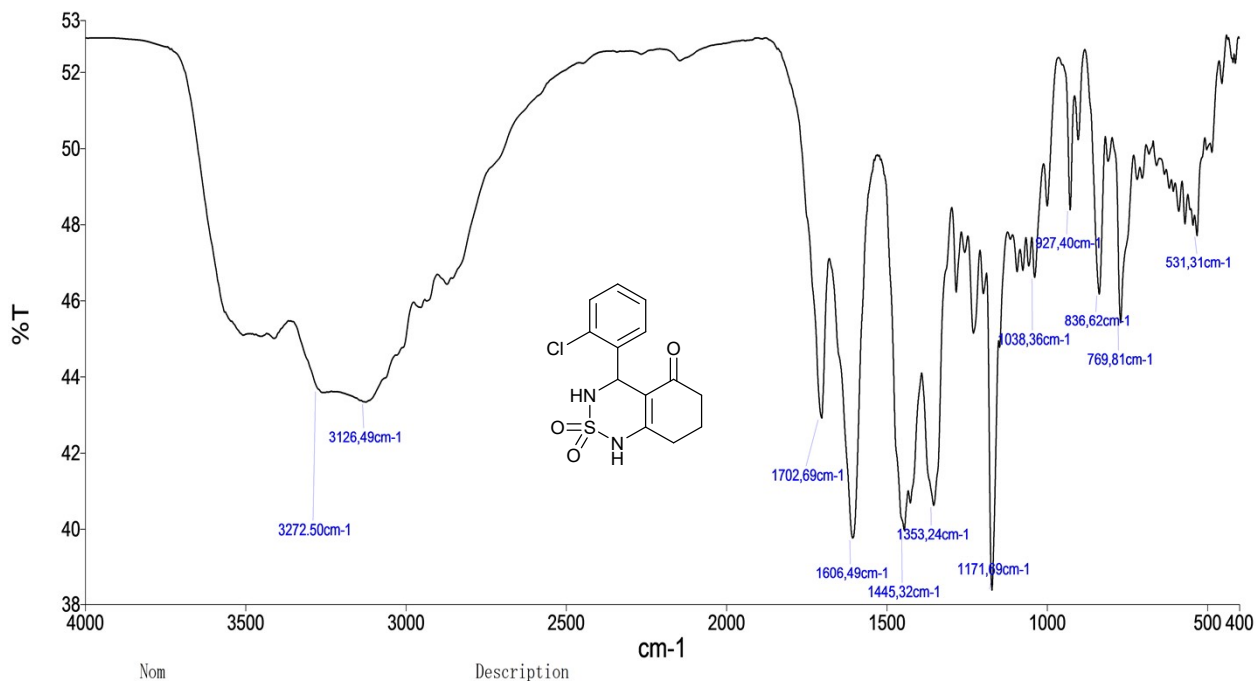

Nom Description  
 Administrator 29\_1 Échantillon 029 Par Administrator Date mercredi, décembre 19 2018

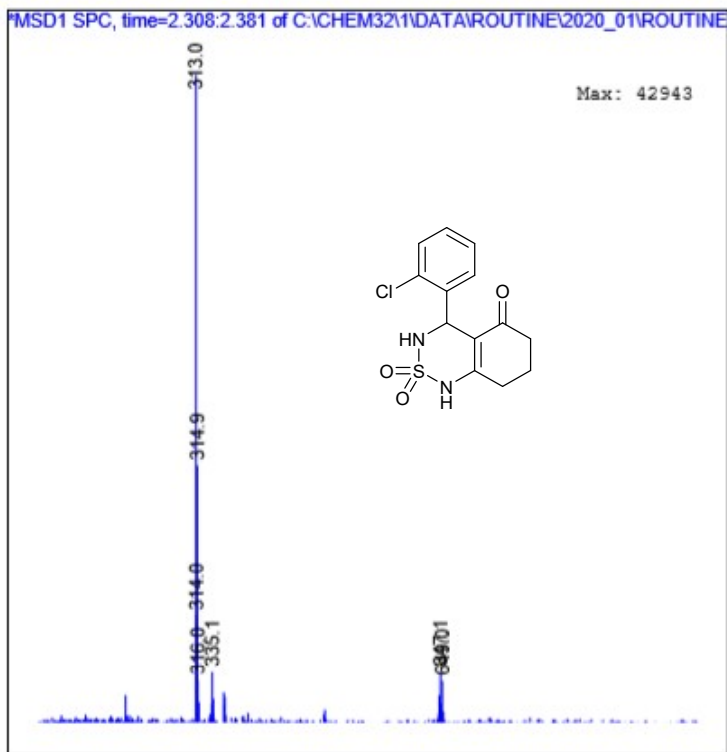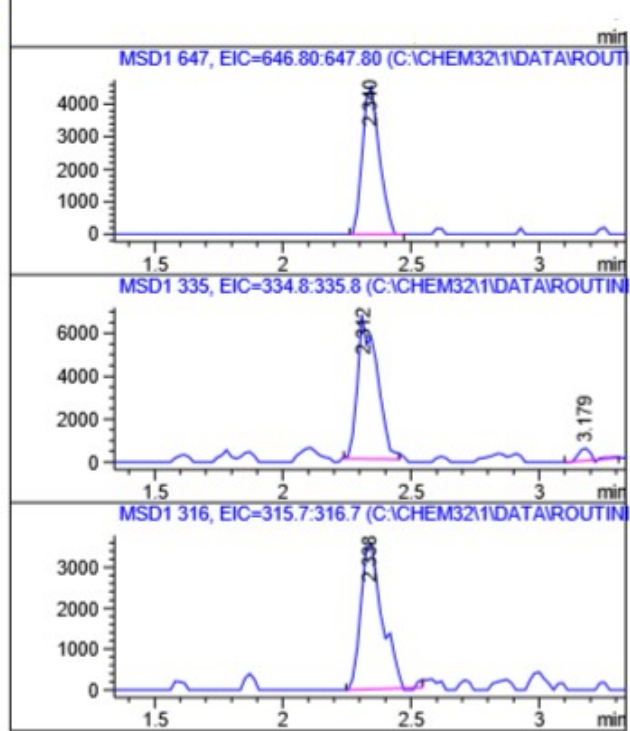

**IR Spectrum:** 4-(2-chlorophenyl)-4,6,7,8-tetrahydro-1H-benzo[c][1,2,6]thiadiazin-5(3H)-one 2,2-dioxide

**LC-MS:** 4-(2-chlorophenyl)-4,6,7,8-tetrahydro-1H-benzo[c][1,2,6]thiadiazin-5(3H)-one 2,2-dioxide



## Binding disposition of compounds after docking calculations in the active site of Eg5

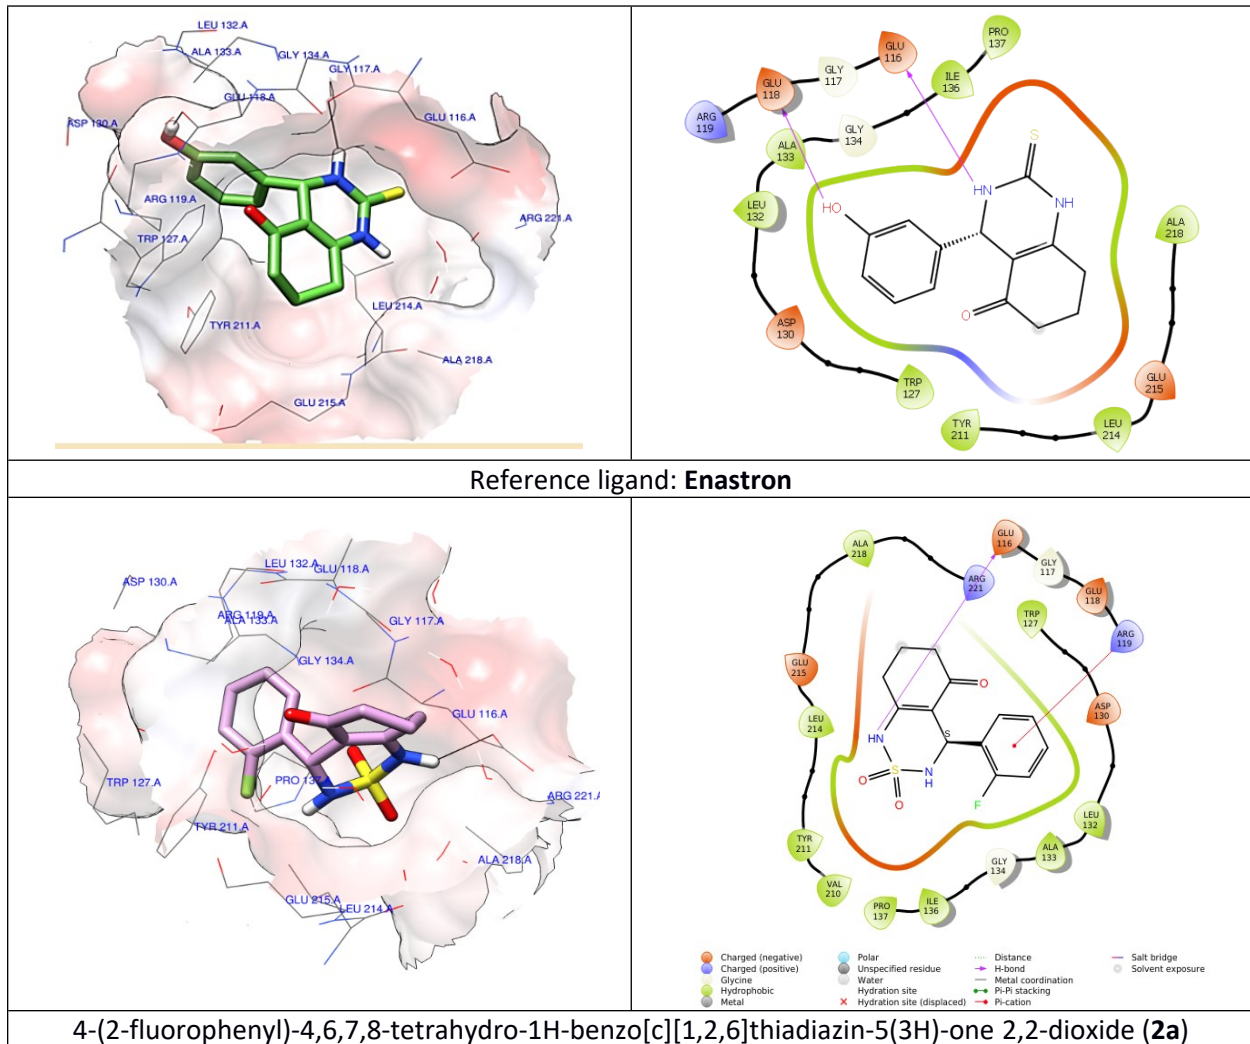

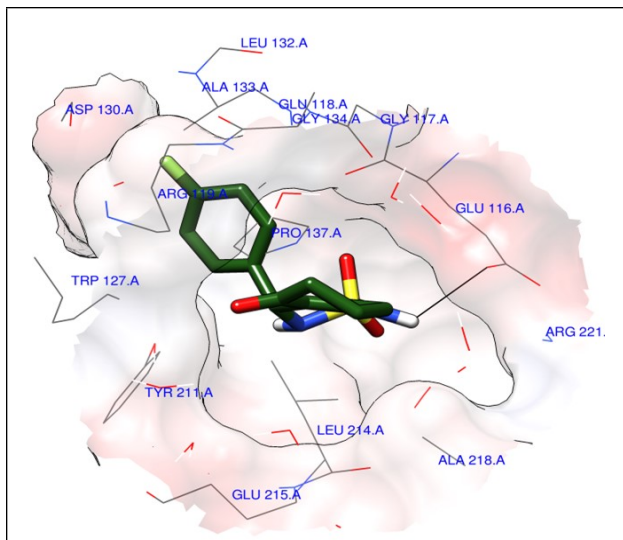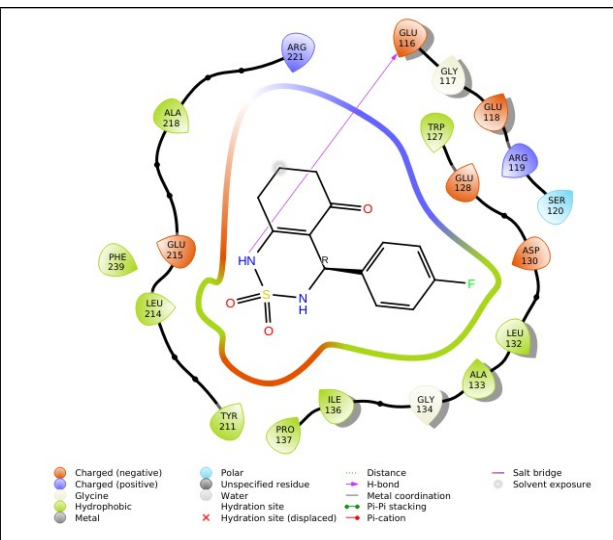

4-(4-fluorophenyl)-4,6,7,8-tetrahydro-1H-benzo[c][1,2,6]thiadiazin-5(3H)-one 2,2-dioxide (**3a**)

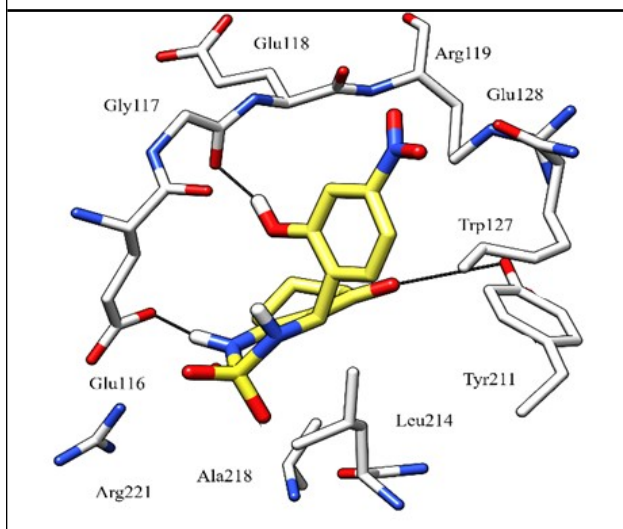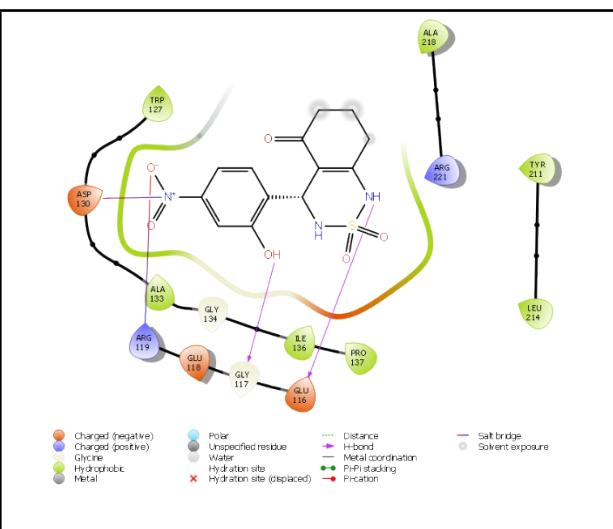

4-(2-hydroxy-4-nitrophenyl)-4,6,7,8-tetrahydro-1H-benzo[c][1,2,6]thiadiazin-5(3H)-one 2,2-dioxide (**6a**)

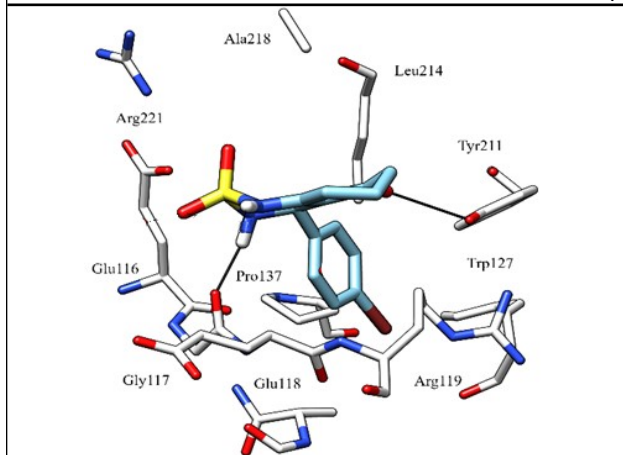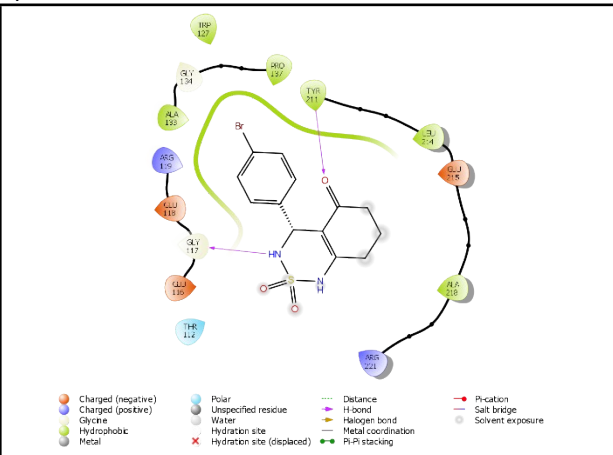

4-(4-bromophenyl)-4,6,7,8-tetrahydro-1H-benzo[c][1,2,6]thiadiazin-5(3H)-one 2,2-dioxide (**7a**)

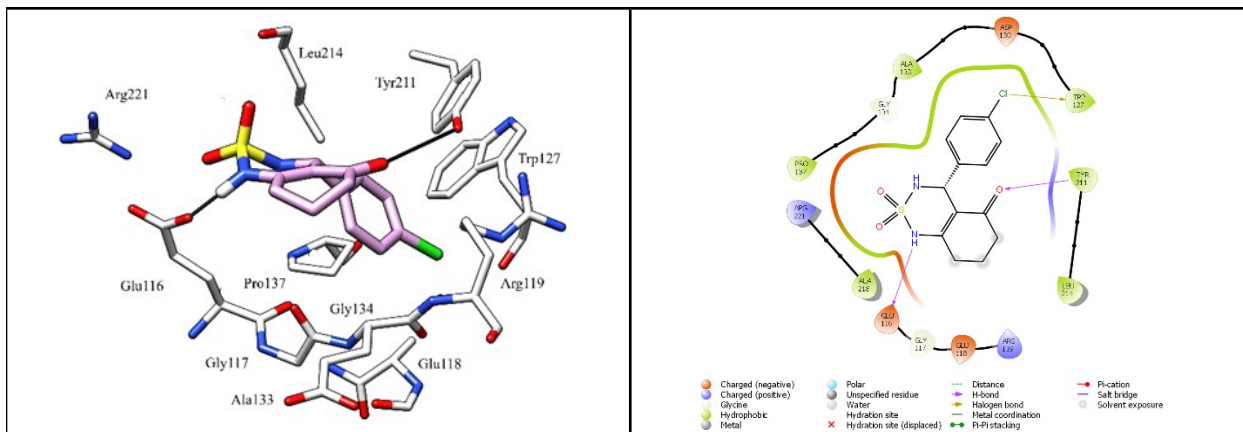

4-(4-chlorophenyl)-4,6,7,8-tetrahydro-1H-benzo[c][1,2,6]thiadiazin-5(3H)-one 2,2-dioxide (**8a**)

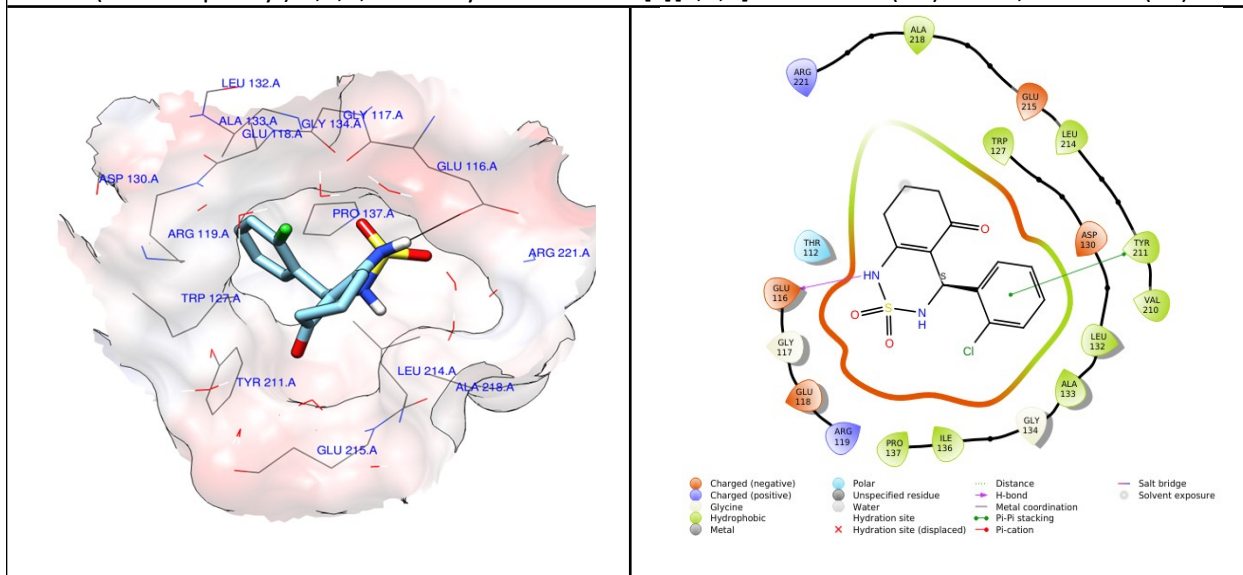

4-(2-chlorophenyl)-4,6,7,8-tetrahydro-1H-benzo[c][1,2,6]thiadiazin-5(3H)-one 2,2-dioxide (**9a**)

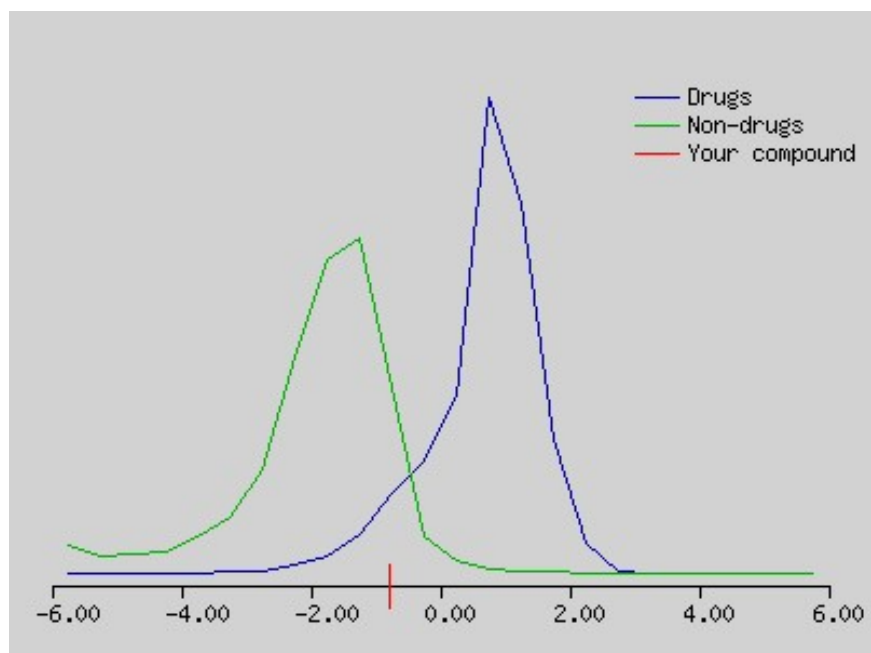

DLS of 1a

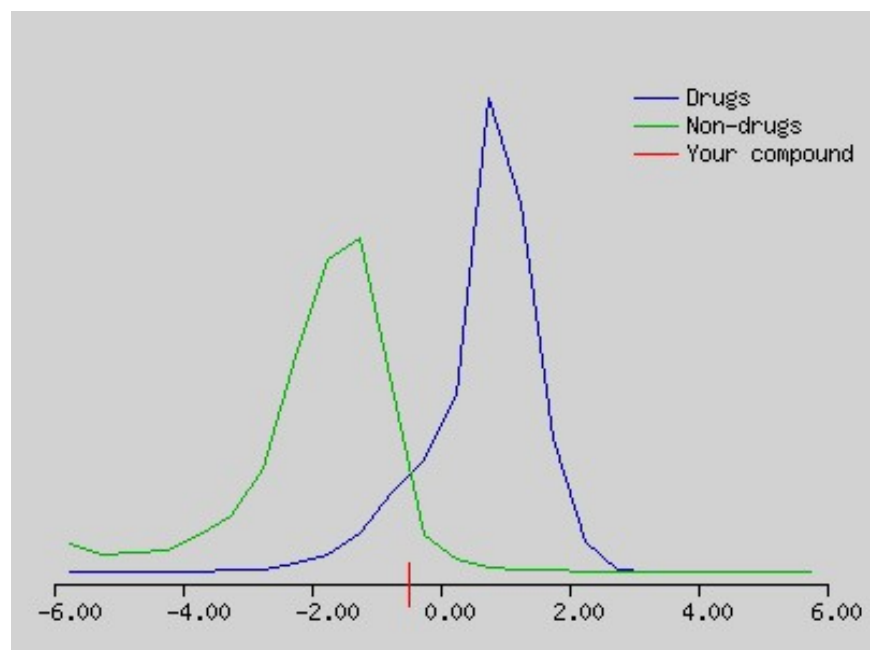

DLS of 2a

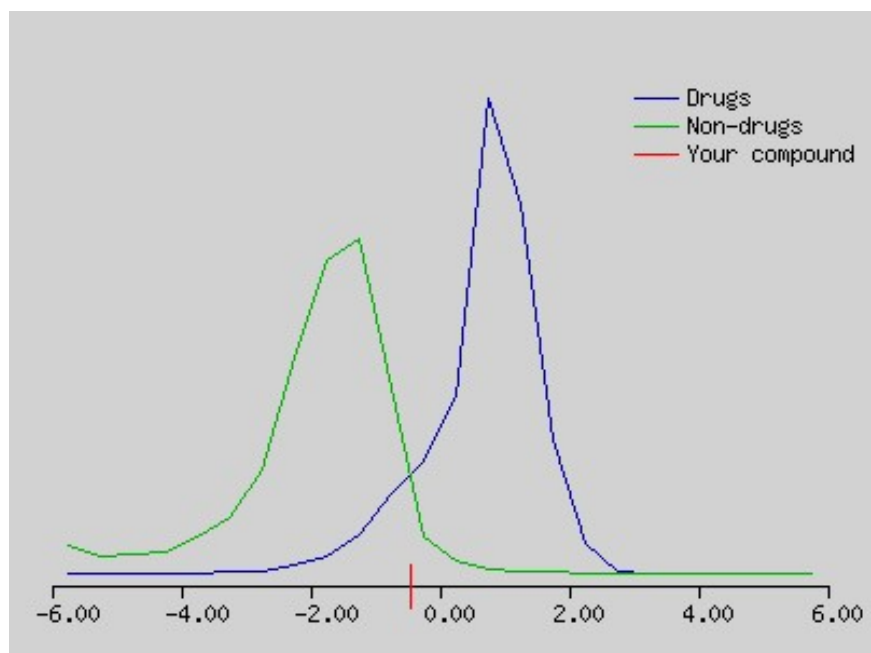

DLS of 3a

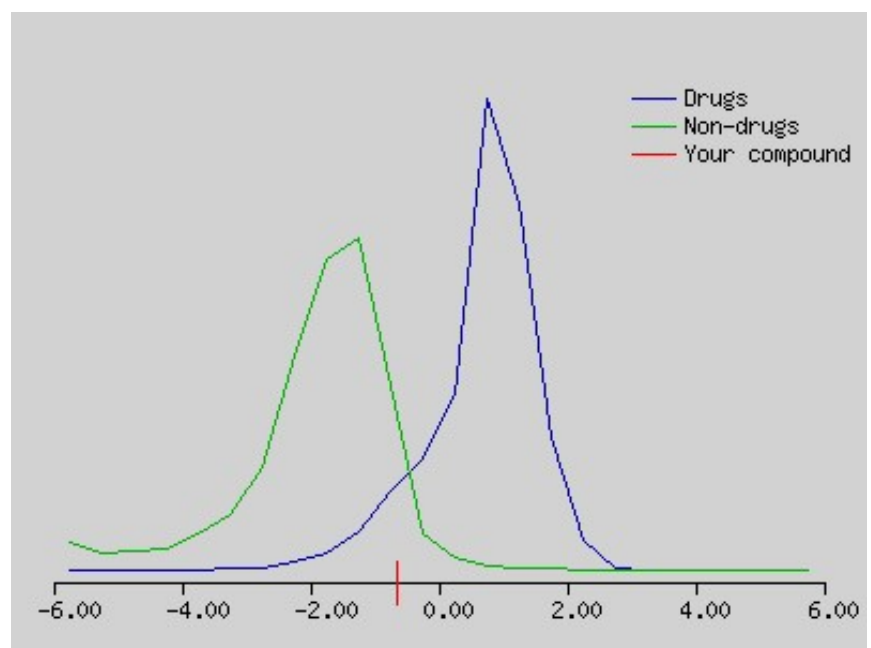

DLS of 4a

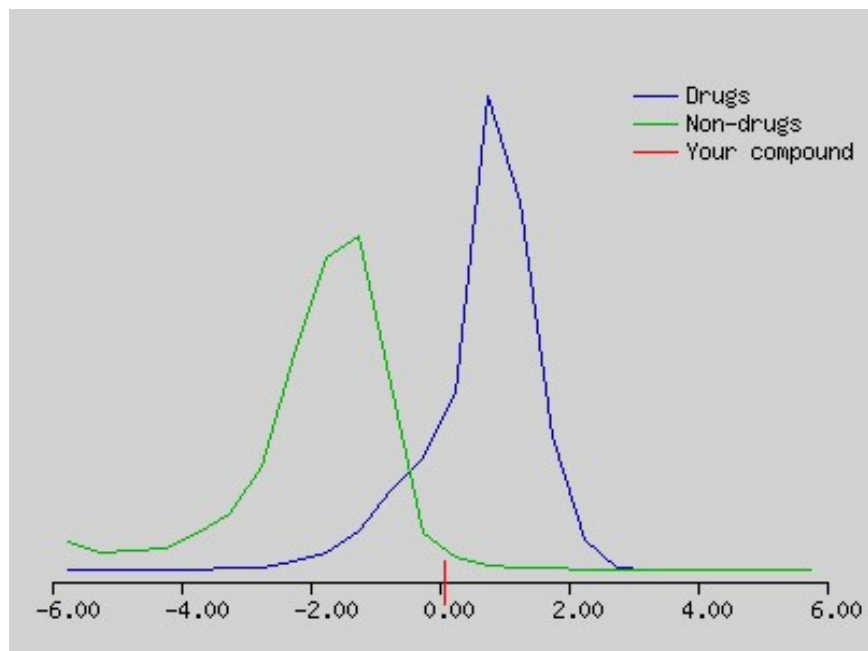

DLS of 6a

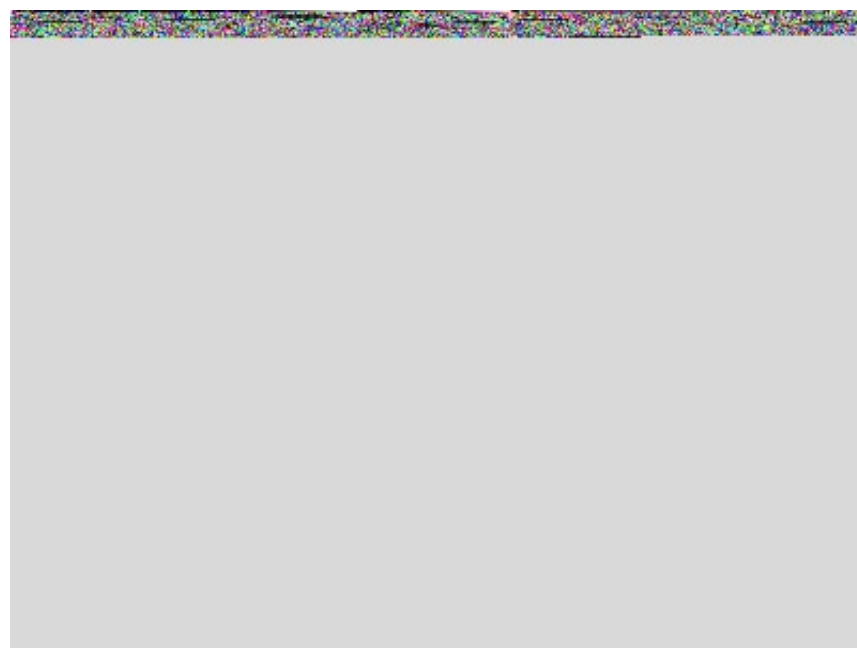

DLS of 7a

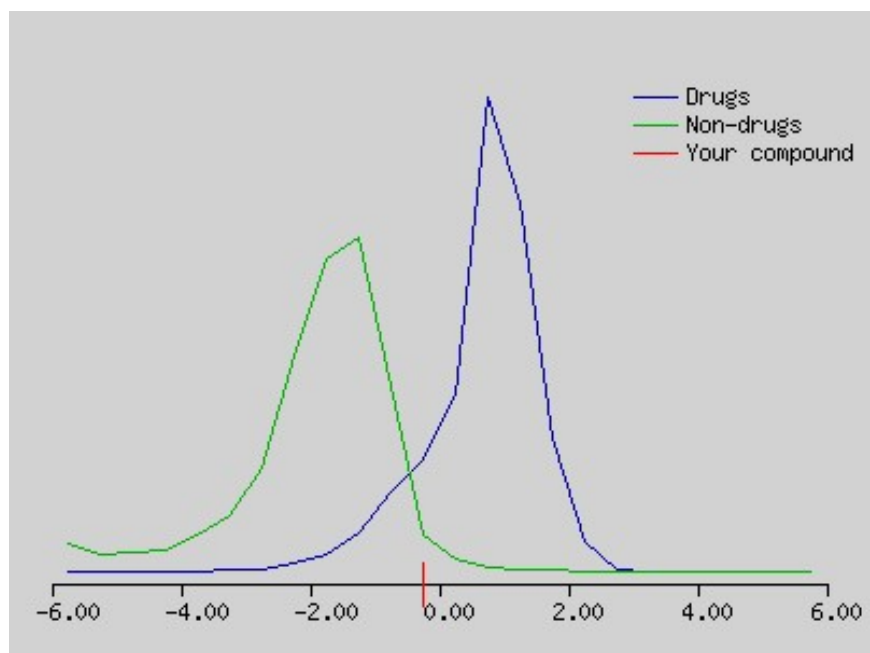

DLS of 8a

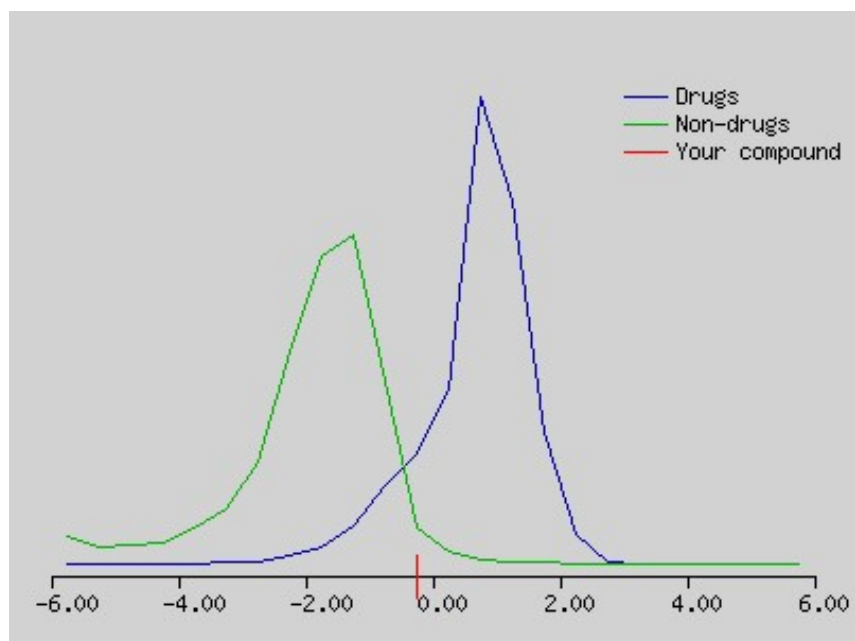

DLS of 9a
